# Supplementary material for: Small RNA mediated gradual control of lipopolysaccharide biosynthesis affects antibiotic resistance in Helicobacter pylori
Source: PubMed Central journal article supplement (PMC8295292; doi:10.1038/s41467-021-24689-2), 2021-07-21
Supplement: 41467_2021_24689_MOESM1_ESM.pdf [file 41467_2021_24689_MOESM1_ESM.pdf]

## **Supplementary Material**

### **Small RNA mediated gradual control of lipopolysaccharide biosynthesis affects antibiotics resistance in *Helicobacter pylori***

Sandy R. Pernitzsch, Mona Alzheimer, Belinda U. Bremer, Marie Robbe-Saule,  
Hilde de Reuse, and Cynthia M. Sharma

#### **This supplement contains:**

Supplementary Figures 1 to 9

Supplementary Tables 1 to 8

Supplementary References

# Supplementary Figures

## Supplementary Figure 1

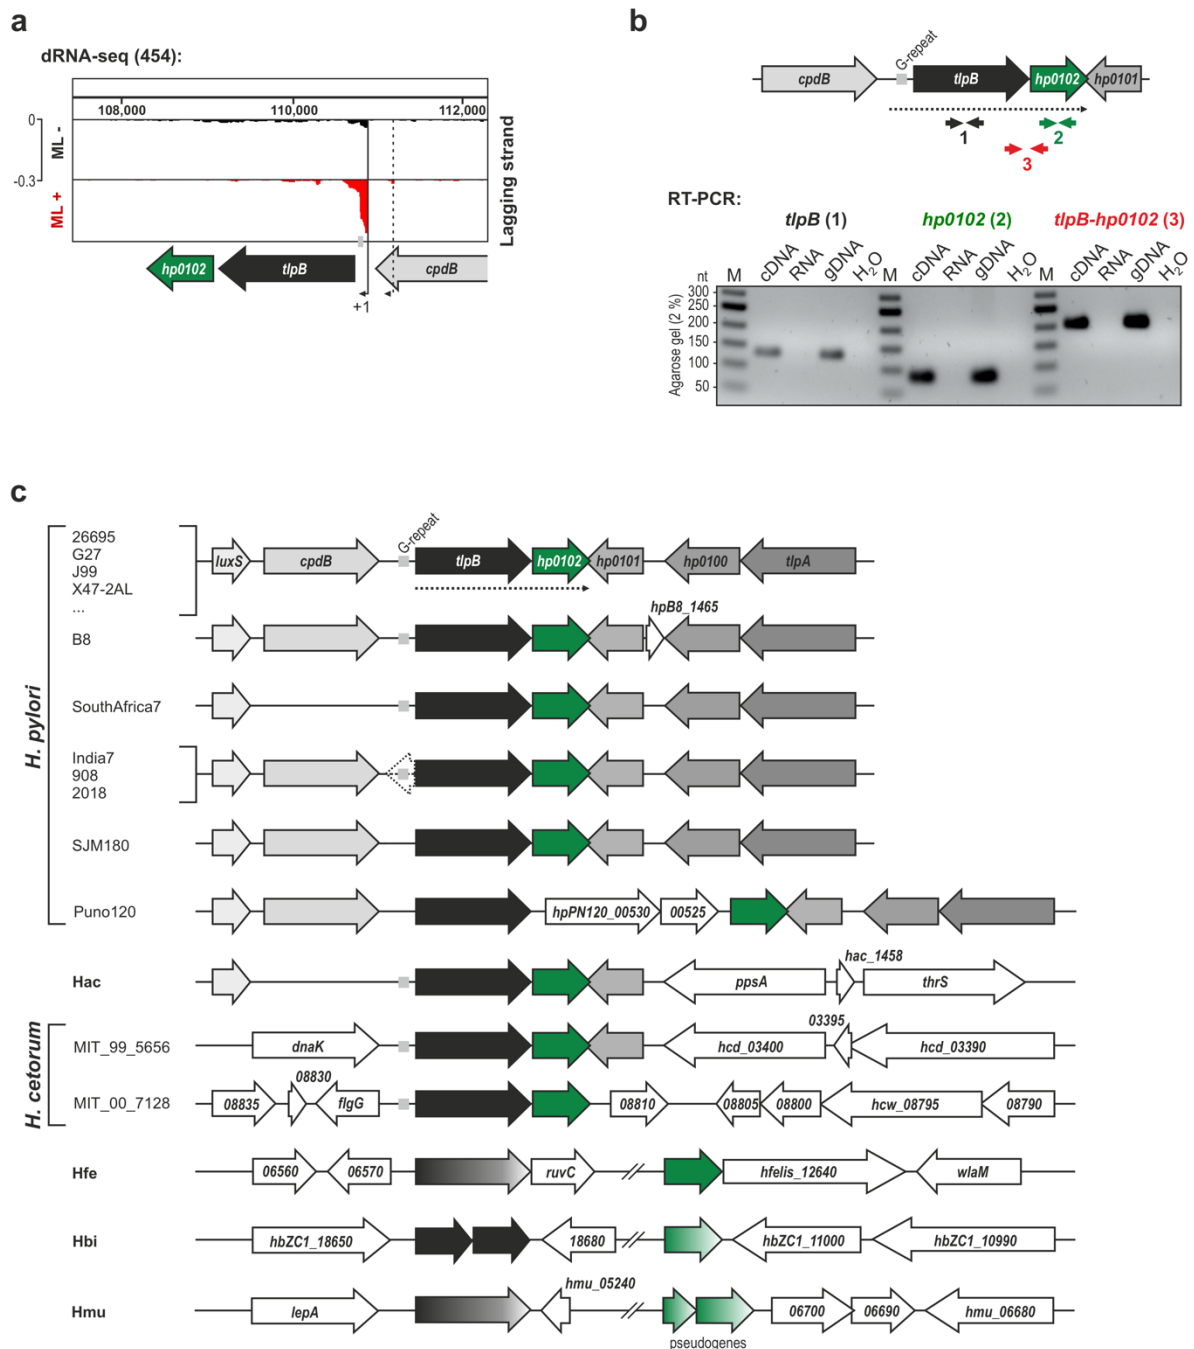

**Supplementary Figure 1: Conservation of the *tlpB*-*hp0102* operon among *Helicobacter* strains and species.** (a) Screenshot of a genome browser showing cDNA read coverage at the bicistronic *tlpB*-*hp0102* operon based on our previous differential RNA-seq (dRNA-seq) analysis of *H. pylori* 26695<sup>1</sup>. RNA samples isolated from cells grown to mid-exponential growth phase (ML) were used for

preparation of two cDNA libraries: (-) RNA left untreated, (+) RNA treated with terminator nuclease to enrich for primary transcripts. Thick arrows represent annotated open reading frames (ORFs) and thin arrows transcriptional start sites (TSS; +1; filled line - primary TSS, dotted line - secondary TSS). **(b)** (*Upper panel*) Schematic representation of the bicistronic *tlpB-hp0102* operon and RT-PCR validation strategy. Small arrows represent locations of gene-specific primers for *tlpB* (black), *hp0102* (green), and overlapping both genes *tlpB-hp0102* (red). RT-PCR assays were performed on total RNA isolated from strain 26695. (*Lower panel*) Agarose gel of RT-PCR reactions performed in the presence (cDNA) and absence (RNA) of reverse transcriptase. Control reactions using genomic DNA (gDNA) of 26695 and water (H<sub>2</sub>O) are indicated. Lane M contains a 50 bp DNA ladder. Underlying source data are provided as a Source Data file. **(c)** Gene synteny analysis of the *tlpB-hp0102* operon (dotted line) in different gastric *Helicobacter* strains and species. Homologs are indicated by the same colors (Hac - *H. acinonychis*, Hce - *H. cetorum*, Hfe - *H. felis*, Hbi - *H. bizzozeronii*, Hmu - *H. mustelae*), unrelated genes are indicated in white. The homopolymeric G-repeat in the 5' UTR of the *tlpB* mRNA is represented by a gray box. A potential ORF (dotted, white arrow) is annotated in the *tlpB* 5' UTR in *H. pylori* strains India7, 908, and 2018. Gradually colored arrows indicate limited sequence homology, whereas fully colored arrows represent homologs with >50 % sequence conservation. In *H. pylori* strain Puno120, two genes belonging to a type-II DNA restriction and modification system are inserted downstream of *tlpB*.

## Supplementary Figure 2

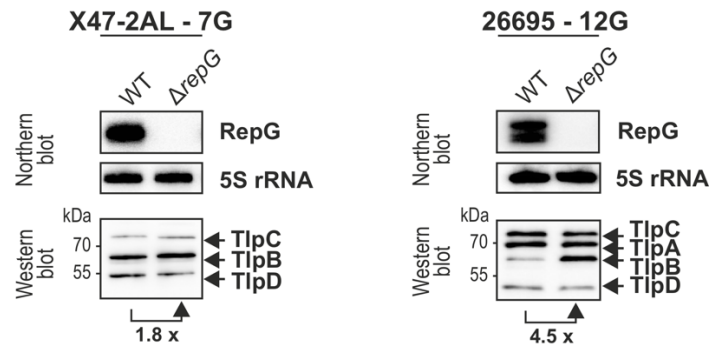

**Supplementary Figure 2: Analysis of RepG-mediated TlpB regulation in different *H. pylori* strains.** Total RNA and protein samples of X47-2AL and 26695 WT and  $\Delta repG$  were harvested in exponential growth phase and were analyzed by northern and western blot, respectively. RepG was detected by radioactively labeled DNA oligonucleotide CSO-0003; 5S rRNA served as loading control. The chemotaxis receptors TlpA, TlpB, TlpC, and TlpD were detected by polyclonal anti-TlpA22 serum. The results shown are representative of at least three independent experiments. Underlying source data are provided as a Source Data file.

### Supplementary Figure 3

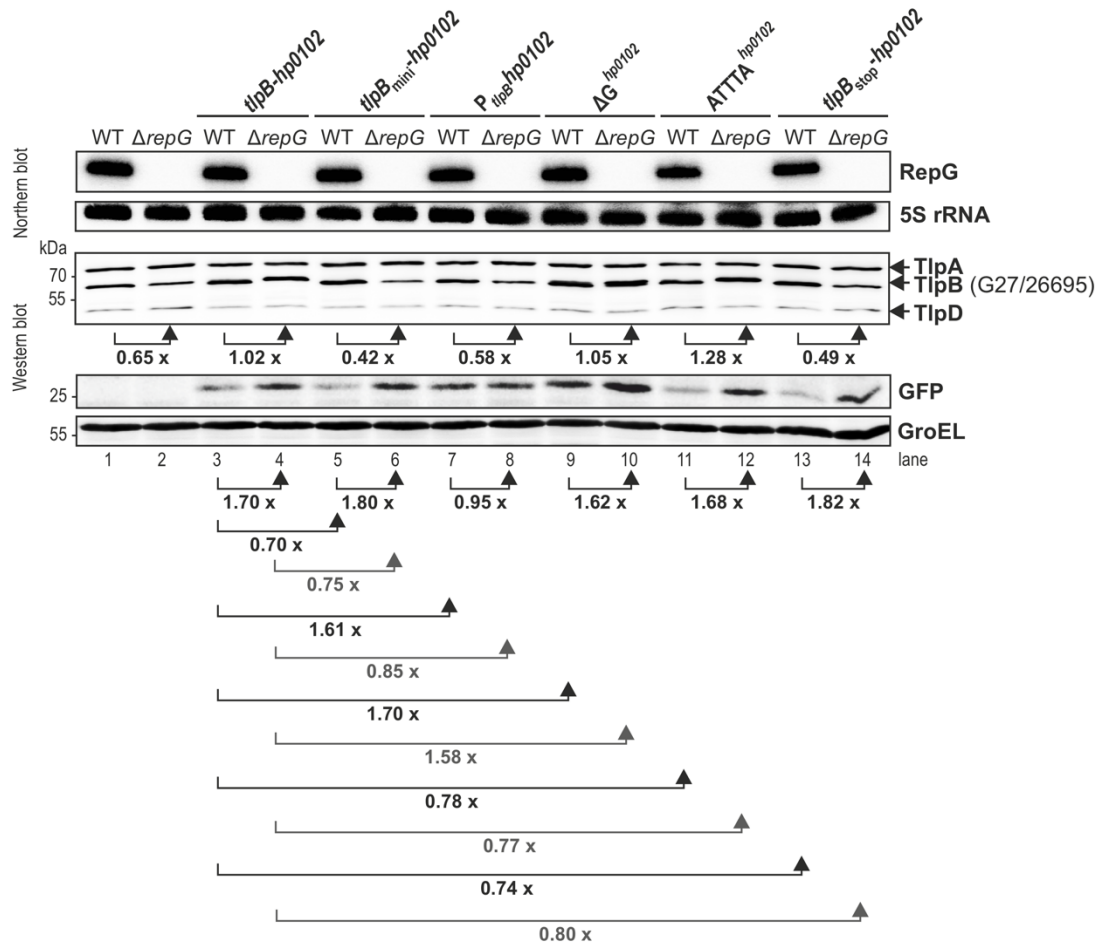

**Supplementary Figure 3: Base-pairing of RepG to the homopolymeric G-repeat in the 5' UTR of the *tlpB-hp0102* mRNA results in repression of *hp0102* at the protein level.** Several *hp0102::gfpmut3* reporter fusions (see also main Figure 2a; derived from *H. pylori* 26695) were investigated in *H. pylori* strain G27. *H. pylori* G27 wildtype,  $\Delta repG$ , as well as WT and  $\Delta repG$  strains carrying indicated *hp0102::gfpmut3* reporter fusions were grown to exponential phase, and RNA and protein samples were analyzed by northern (RepG, CSO-0003) and western blot (HP0102::GFP with anti-GFP antibody and TlpB with anti-TlpA22 antiserum), respectively. GroEL served as a loading control (anti-GroEL antibody). Depending on the G-repeat length, RepG mediates both activation of the endogenous G27 *tlpB* (14G) and repression of the ectopic *tlpB* of the 26695 (12G) reporter construct<sup>2</sup>. Accordingly, TlpB levels in the strains carrying the *tlpB-hp0102* (lanes 3-4),  $\Delta G^{hp0102}$  (lanes 9-10) or  $\Delta TTTA^{hp0102}$  (lanes 11-12) fusions are the sum of both the endogenous G27 TlpB and ectopically expressed 26695 TlpB levels. The results shown are representative of at least three independent experiments. The joint result of all three replicates is shown in the bar diagram in Figure 2b. Source data underlying this figure is provided as a Source Data file.



**Supplementary Figure 4: Sequence alignment of the promoter, 5' UTR, and first amino acids of the *tlpB* coding region as well as the *tlpB*-*hp0102* intergenic region (IGR) in diverse *H. pylori* strains and *H. acinonychis* (Hac). (a-b)** The *tlpB* stop codon, putative ribosome binding site (RBS), and annotated start codons of *tlpB* and *hp0102* are highlighted in light green. Potential RepG sRNA interaction sites (homopolymeric G-repeat and G<sup>*hp0102*</sup>) are boxed in gray and orange, respectively. RepG-mediated *tlpB*-*hp0102* co-regulation was investigated in the strains marked in bold. (c) In *H. pylori* 26695, RepG was predicted to potentially base-pair to G<sup>*hp0102*</sup> (orange) in the *tlpB*-*hp0102* IGR. The *tlpB* stop codon is marked in bold. Numbers indicate positions relative to the *hp0102* start codon. The previously identified *tlpB* binding site in the RepG terminator loop is shown in blue.

## Supplementary Figure 5

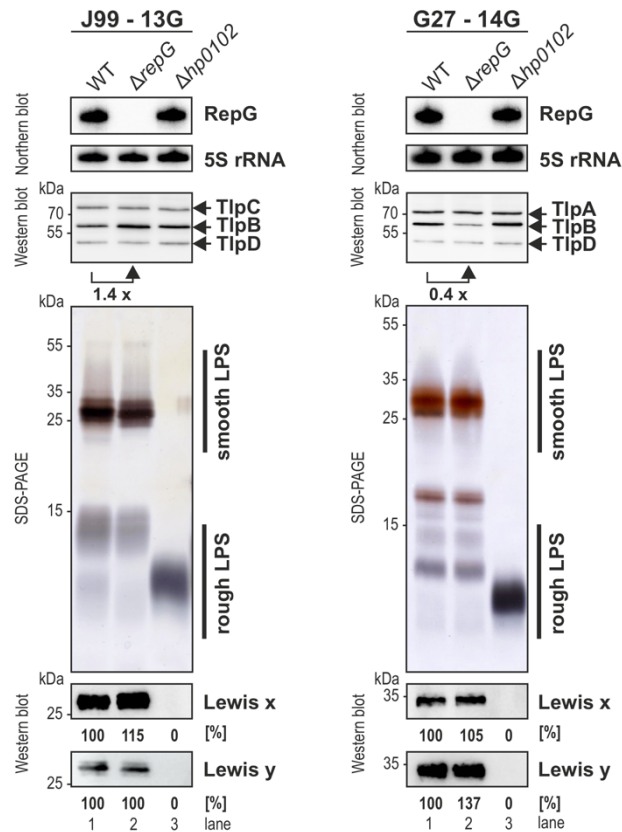

**Supplementary Figure 5: HP0102 is involved in smooth LPS production in various *H. pylori* strains.** Wildtype,  $\Delta repG$ , and  $\Delta hp0102$  deletion mutants of *H. pylori* strains J99 and G27 were grown to exponential growth phase. Total RNA and protein samples were analyzed by northern and western blot, respectively. RepG and the chemotaxis receptors TlpA, TlpB, TlpC, and TlpD were detected using a polyclonal anti-TlpA22 antiserum. *H. pylori* strains J99 and G27 each express only three chemotaxis receptors. LPS patterns and Lewis x/y antigen expression were analyzed by silver staining and western blot using a Lewis x/y antigen-specific antibody, respectively. The results shown are representative of at least three independent experiments. Source data underlying this figure is provided as a Source Data file.



## Supplementary Figure 6

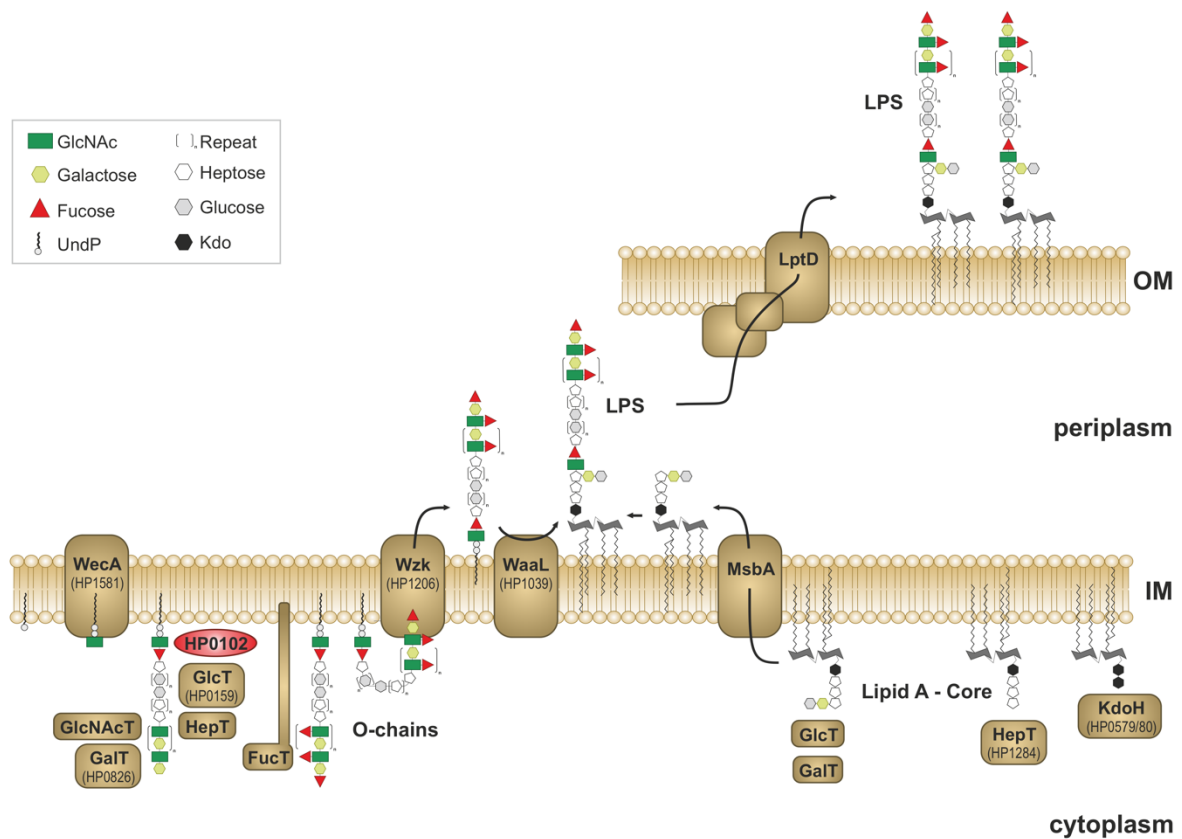

**Schematic of the LPS biosynthesis pathway in *H. pylori*.** Summary of the LPS biosynthesis pathway in *H. pylori* based on literature<sup>3,4</sup> and results from this study. The lipid A-core (right) and O-chains (left) are assembled independently from each other in the cytoplasm. Lipid A-core: Heptose and glucose units are added to the lipid A by multiple heptosyltransferases (HepTs) and glucosyltransferases (GlcTs). O-chains: The O-chains are assembled onto a polyisoprenoid membrane anchor (UndP). The initiating glycosyltransferase WecA transfers an N-acetylglucosamine unit from a nucleotide-activated donor (uridine diphosphate (UDP)-GlcNAc) to the lipid carrier, providing the platform for the O-chain synthesis. The linear O-chain backbone is assembled by processive galactosyltransferases (GalTs) and N-acetylglucosaminyltransferases (GlcNAcTs). Fucosyltransferases (FucTs) attach fucose units to the O-chain backbone, generating Lewis antigens. O-chains and the lipid A-core moiety are translocated through the inner membrane (IM) by the flippase Wzk and transmembrane protein MsbA, respectively, and are fused together by the O-chain ligase WaaL. The LPS molecule is then transported to the outer leaflet of the outer membrane (OM). Our results together with recent observations by Li et al.<sup>4</sup> indicate that HP0102 is the fucosyltransferase involved in the biosynthesis of the conserved trisaccharide of the O-antigen. See also Figure S7.

## Supplementary Figure 7

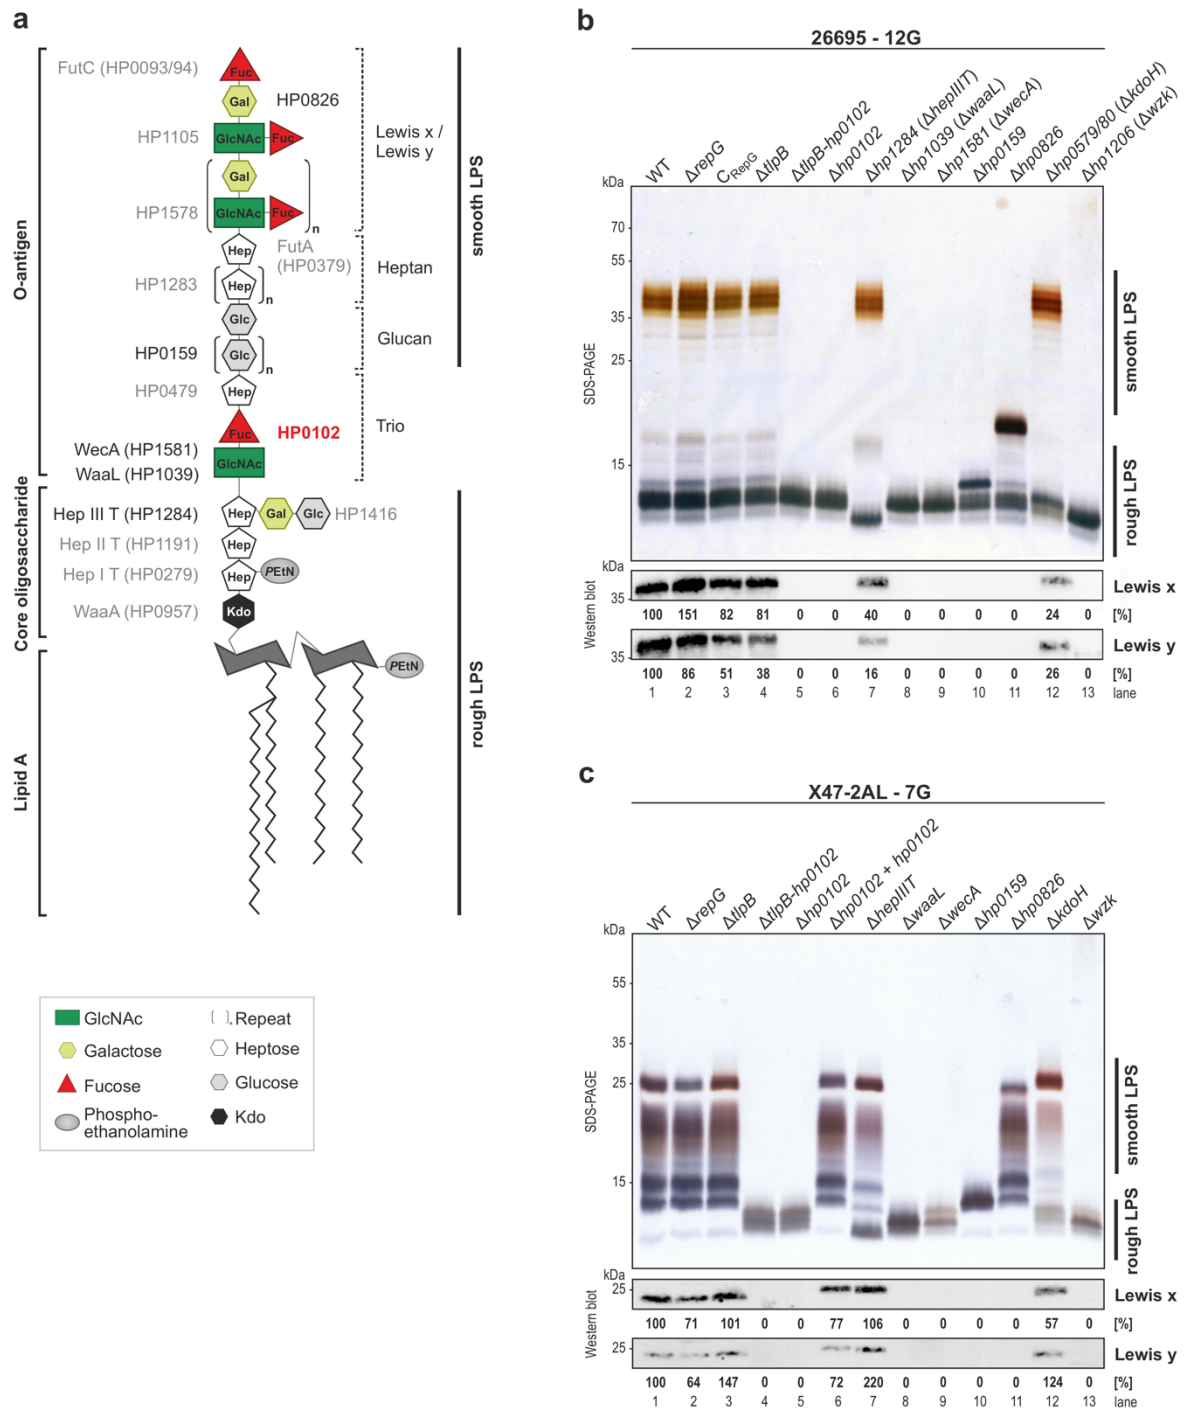

**Supplementary Figure 7: Comparison of LPS profiles elicited by deletion *hp0102* and additional genes involved in LPS biosynthesis in *H. pylori* strains 26695 and X47-2AL. (a)** Schematic representation of the *H. pylori* 26695 LPS structure and genes involved in its synthesis according to and illustration inspired by Li et al. (2019)<sup>4</sup>. LPS samples harvested from WT and indicated mutant strains of *H. pylori* strains 26695 (b) and X47-2AL (c) during exponential growth were separated on 15 % SDS-PAGE gels and either directly visualized by silver staining, or electro-blotted to PVDF membranes and

probed with Lewis x/y antigen-specific antibodies. The results shown are representative of at least three independent experiments. Source data underlying b and c are provided as a Source Data file.

## Supplementary Figure 8

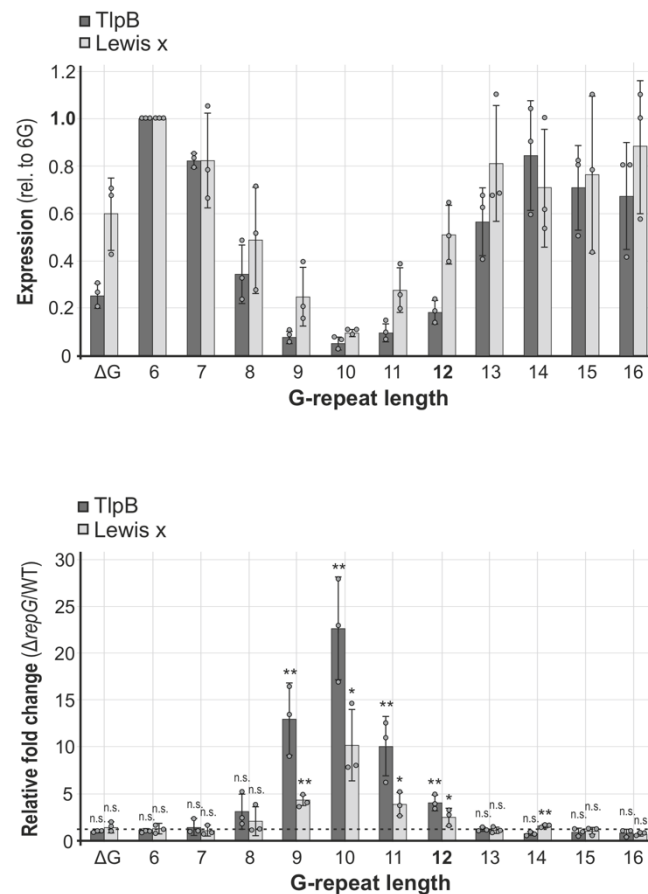

**Supplementary Figure 8: The length of the homopolymeric G-repeat in the *tlpB* mRNA leader impacts RepG-mediated TlpB and HP0102 regulation, and in turn Lewis x antigen expression.** (*Upper panel*) Quantification of relative TlpB protein and Lewis x antigen levels in the different *tlpB* leader mutants of *H. pylori* strain 26695 in the wild-type background grown to exponential growth phase. TlpB protein and Lewis x antigen levels in the *tlpB* 6G-leader variant were used as reference and set to 1. (*Lower panel*) Relative fold change of TlpB protein and Lewis x antigen levels upon *repG* deletion in *tlpB* leader mutants when compared to the respective wild-type backgrounds. Bars represent the mean determinations of triplicate measurements ( $n = 3$ )  $\pm$  standard deviation (s.d.) derived from western blot quantification (see main Figure 5b). \*\* - significant,  $p$ -value < 0.01; \* - significant,  $p$ -value < 0.05; n.s., not significant; Student's t-test, two-tailed. Source data underlying this figure is provided as a Source Data file.

## Supplementary Figure 9

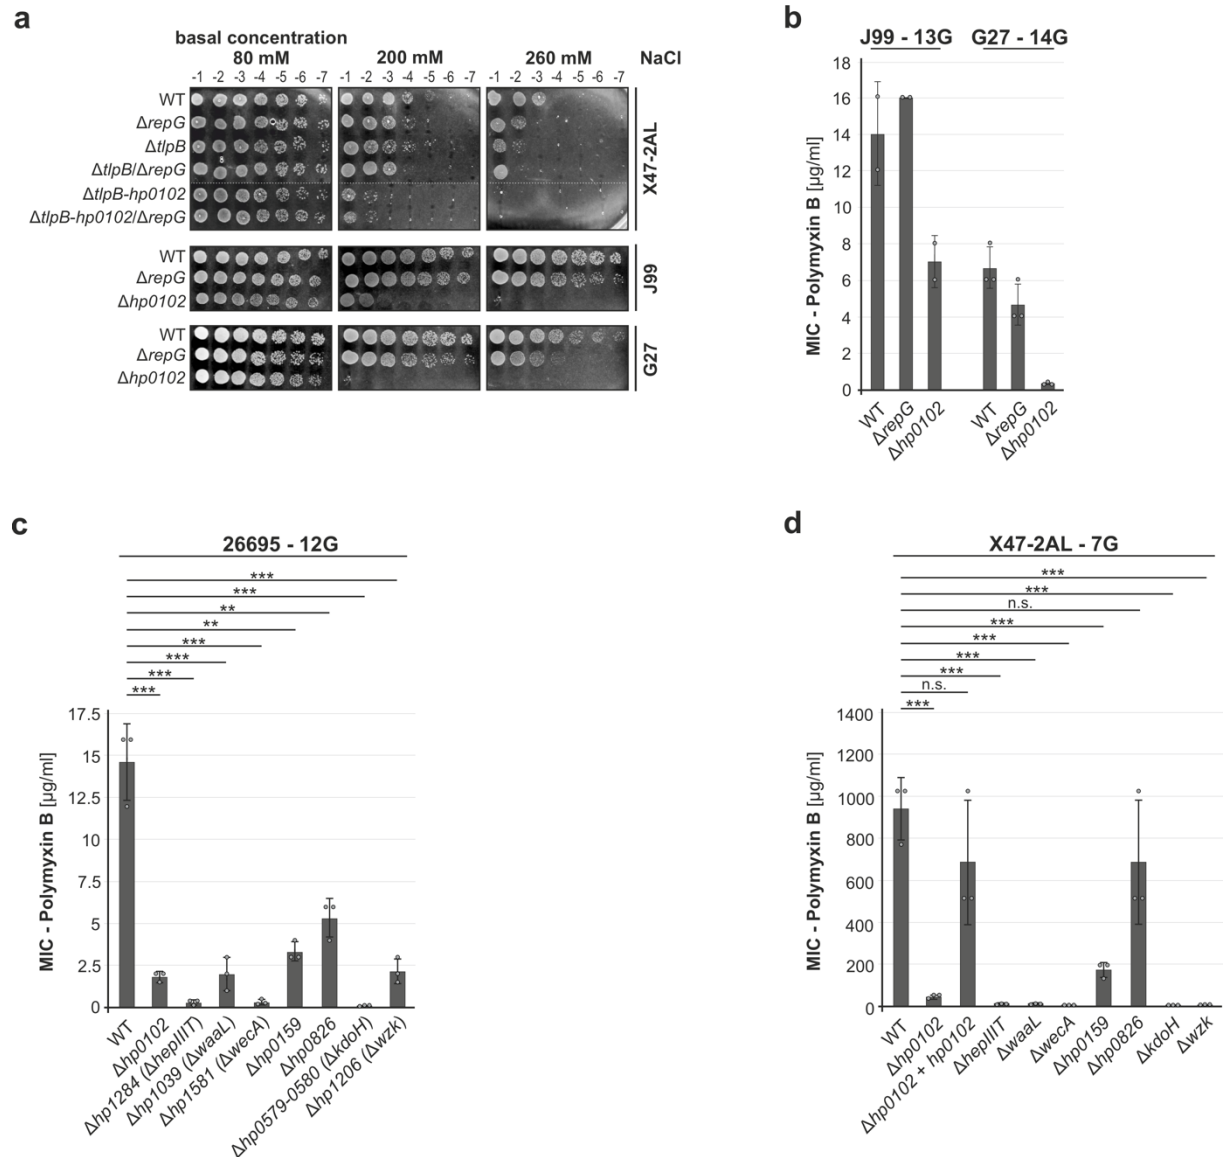

**Supplementary Figure 9: *H. pylori* Δhp0102 mutant strains show increased susceptibility to high salt-induced membrane stress and to polymyxin B. (a)** Growth of wild-type and indicated mutant strains of *H. pylori* X47-2AL, J99, and G27 on GC-agar plates without (80 mM, basal concentration) or with increased NaCl concentrations (200 mM, 260 mM). Ten-fold dilutions of the bacterial suspensions were spotted on indicated GC-agar plates and incubated for 3 to 5 days at 37 °C under microaerobic conditions. The results shown are representative of at least two biological replicates. **(b-d)** Antibiotic sensitivity testing using E-tests (bioMérieux, Inc.) for *H. pylori* strains J99 and G27 (b), X47-2AL (c), and 26695 (d). *H. pylori* cells corresponding to an OD<sub>600nm</sub> of 0.01 were plated on GC-agar plates and E-test stripes (0.064-1024 μg/ml polymyxin B) were placed on top. MICs were determined after 3 days of incubation under microaerobic conditions. Bars represent the mean determinations of triplicate measurements of MICs (n = 3, exception: n = 2 for J99) ± standard deviations (s.d.). \*\*\* - highly significant, p-value < 0.001; \*\* - very significant, p-value < 0.01; n.s., not significant; Student's t-test, two-tailed. Source data underlying b, c, and d are provided as a Source Data file.

## Supplemental Tables

**Supplementary Table 1: Minimal inhibitory concentrations (MICs) of *H. pylori* 26695, X47-2AL, J99, and G27 wild-type and mutant strains against polymyxin B.** MICs against polymyxin B (PxB) were determined using Epsilometer (E)-tests (bioMérieux) in three biological replicates and the averages are given in  $\mu\text{g/ml}$  with the corresponding standard deviations (s.d.). Fold changes of *H. pylori* mutant strains were calculated relative to their respective parental wildtype. Positive (+) fold changes indicate an increased resistance to polymyxin B compared to WT, negative (-) fold changes represent decreased resistance (-xx-fold more sensitive compared to WT; +xx-fold less sensitive compared to WT).

| Strains                                | Role in LPS biosynthesis    | PxB MIC<br>[ $\mu\text{g/ml}$ ] | Fold change<br>(relative to WT) |
|----------------------------------------|-----------------------------|---------------------------------|---------------------------------|
| <b><i>H. pylori</i> strain 26695</b>   |                             |                                 |                                 |
| WT                                     | full-length LPS             | 14.7 $\pm$ 2.3                  |                                 |
| $\Delta\text{repG}$                    |                             | 29.3 $\pm$ 4.6                  | +2.0                            |
| C <sub>RepG</sub>                      |                             | 14.7 $\pm$ 2.3                  | –                               |
| $\Delta\text{tlpB}$                    |                             | 21.3 $\pm$ 4.6                  | +1.5                            |
| $\Delta\text{tlpB-hp0102}$             |                             | 2.0 $\pm$ 0.0                   | -7.2                            |
| $\Delta\text{hp0102}$                  | Trio fucosyltransferase     | 1.8 $\pm$ 0.3                   | -7.8                            |
| $\Delta\text{hp1284}$ (Hep III T)      | Hep III transferase         | 0.3 $\pm$ 0.1                   | -48.7                           |
| $\Delta\text{hp1039}$ (WaaL)           | O-antigen ligase            | 2.0 $\pm$ 1.0                   | -7.0                            |
| $\Delta\text{hp1581}$ (WecA)           | O-antigen initiating ligase | 0.3 $\pm$ 0.2                   | -45.9                           |
| $\Delta\text{hp0159}$                  | Glycosyltransferase         | 3.3 $\pm$ 0.6                   | -4.3                            |
| $\Delta\text{hp0826}$                  | Galactosyltransferase       | 5.3 $\pm$ 1.2                   | -2.7                            |
| $\Delta\text{hp0579-580}$              | KDO hydrolase               | 0.1 $\pm$ 0.035                 | -137.3                          |
| $\Delta\text{hp1206}$ (Wzk)            | O-antigen flippase          | 2.2 $\pm$ 0.8                   | -6.6                            |
| <b><i>H. pylori</i> strain X47-2AL</b> |                             |                                 |                                 |
| WT                                     | full-length LPS             | 938.7 $\pm$ 147.8               |                                 |
| $\Delta\text{repG}$                    |                             | 682.7 $\pm$ 147.8               | -1.4                            |
| $\Delta\text{tlpB}$                    |                             | 768.0 $\pm$ 256.0               | -1.2                            |
| $\Delta\text{tlpB-hp0102}$             |                             | 32.0 $\pm$ 0.0                  | -29.3                           |
| $\Delta\text{hp0102}$                  | Trio fucosyltransferase     | 42.7 $\pm$ 9.2                  | -22.0                           |
| $\Delta\text{hp0102} + \text{hp0102}$  |                             | 682.7 $\pm$ 295.6               | -1.4                            |
| $\Delta\text{hp1284}$ (Hep III T)      | Hep III transferase         | 6.0 $\pm$ 2.0                   | -156.4                          |
| $\Delta\text{hp1039}$ (WaaL)           | O-antigen ligase            | 6.0 $\pm$ 2.0                   | -156.4                          |
| $\Delta\text{hp1581}$ (WecA)           | O-antigen initiating ligase | 0.4 $\pm$ 0.2                   | -2,631.8                        |
| $\Delta\text{hp0159}$                  | Glycosyltransferase         | 170.7 $\pm$ 37.0                | -5.5                            |
| $\Delta\text{hp0826}$                  | Galactosyltransferase       | 682.7 $\pm$ 295.6               | -1.4                            |
| $\Delta\text{hp0579-580}$              | KDO hydrolase               | 0.1 $\pm$ 0.043                 | -16,822.0                       |
| $\Delta\text{hp1206}$ (Wzk)            | O-antigen flippase          | 2.5 $\pm$ 0.9                   | -375.5                          |
| <b><i>H. pylori</i> strain J99</b>     |                             |                                 |                                 |
| WT                                     | full-length LPS             | 14.0 $\pm$ 2.0                  |                                 |
| $\Delta\text{repG}$                    |                             | 14.0 $\pm$ 2.0                  | –                               |
| $\Delta\text{hp0102}$                  | Trio fucosyltransferase     | 7.3 $\pm$ 1.5                   | -1.9                            |
| <b><i>H. pylori</i> strain G27</b>     |                             |                                 |                                 |
| WT                                     | full-length LPS             | 7.0 $\pm$ 1.4                   |                                 |
| $\Delta\text{repG}$                    |                             | 5.0 $\pm$ 1.4                   | -1.4                            |
| $\Delta\text{hp0102}$                  | Trio fucosyltransferase     | 0.3 $\pm$ 0.09                  | -23.3                           |

**Supplementary Table 2: SSRs associated with genes involved in LPS biosynthesis in *H. pylori* strain 26695**

| <i>H. pylori</i> 26695 – homopolymeric repeats |                                     |                                        |                                    |                        |                                    |
|------------------------------------------------|-------------------------------------|----------------------------------------|------------------------------------|------------------------|------------------------------------|
| Promoter                                       |                                     | 5' UTR                                 |                                    | Coding sequence        |                                    |
| ID (SSR)                                       | Function                            | ID (SSR)                               | Function                           | ID (SSR)               | Function                           |
| <i>hp0651</i> (A7)                             | <i>futB</i> ,<br>fucosyltransferase | <i>hp0208</i> (A11 <sup>b</sup> )      | <i>rfaJ2</i> , glucosyltransferase | <i>hp0093-94</i> (C14) | <i>fucC</i> , fucosyltransferase   |
|                                                |                                     | <b><i>hp0102</i> (G12<sup>a</sup>)</b> | <b>fucosyltransferase</b>          | <i>hp0208</i> (AG11)   | <i>rfaJ2</i> , glycosyltransferase |
|                                                |                                     | <i>hp1105</i> (A15)                    | N-acetyl-glycosamyltransferase     | <i>hp0217</i> (G12)    | N-acetylgalactosaminyltransferase  |
|                                                |                                     |                                        |                                    | <i>hp0379</i> (C13)    | <i>futA</i> , fucosyltransferase   |
|                                                |                                     |                                        |                                    | <i>hp0580</i> (C8)     | Kdo-hydrolase                      |
|                                                |                                     |                                        |                                    | <i>hp0619</i> (C13)    | <i>lex2B</i> , glycosyltransferase |
|                                                |                                     |                                        |                                    | <i>hp0651</i> (C13)    | <i>futB</i> , fucosyltransferase   |
|                                                |                                     |                                        |                                    | <i>hp1417</i> (AG9)    | hypothetical protein <sup>c</sup>  |

<sup>a</sup>*hp0102* is located in an operon with *tlpB*, G12 in the 5' UTR of the *tlpB* mRNA

<sup>b</sup>*hp0208* does not have a defined TSS, but RNA-seq indicated a potential 110-nt long 5' UTR (Pernitzsch and Sharma, unpublished)

<sup>c</sup>*hp1417* is potentially involved in LPS core assembly<sup>3</sup>

**Supplementary Table 3: G-repeat length in the *tlpB* 5' UTR of sequential *H. pylori* isolates from human or after re-isolation from animals.** Lines frame *H. pylori* isolates that were obtained from the same patient or that were re-isolated after mice/gerbil infection studies. The lengths of the G-repeats in the *tlpB* 5' UTRs of isolates from Narino, Colombia, from the study of Kennemann *et al.* (2011)<sup>5</sup> were re-sequenced by Sanger sequencing.

| Strain | NCBI Acc. No    | Time scale | G-repeat length     | G-repeat variation | Origin/Comment                                                                                                                                                            | Reference        |
|--------|-----------------|------------|---------------------|--------------------|---------------------------------------------------------------------------------------------------------------------------------------------------------------------------|------------------|
| 908    | NC_017357       |            | 17G-TGGTTTT-17G     |                    | West African duodenal ulcer disease patient in France                                                                                                                     | Ref <sup>6</sup> |
| 2017   | NC_017374       | 10 yrs     | 15G                 | yes                | Re-isolate from antrum                                                                                                                                                    | Ref <sup>7</sup> |
| 2018   | NC_017381       | 10 yrs     | 13G                 | yes                | Re-isolate from corpus                                                                                                                                                    |                  |
| NQ367  | NZ_CADL00000000 |            | 15/16G <sup>o</sup> |                    | Isolates from Narino, Colombia                                                                                                                                            | Ref <sup>5</sup> |
| NQ1671 | NZ_CADM00000000 | 3 yrs      | 13G                 | yes                |                                                                                                                                                                           |                  |
| NQ4191 | NZ_CADN00000000 | 16 yrs     | 13G                 | yes                |                                                                                                                                                                           |                  |
| NQ392  | NZ_CADI00000000 |            | 13G <sup>o</sup>    |                    | Isolates from Narino, Colombia                                                                                                                                            | Ref <sup>5</sup> |
| NQ1707 | NZ_CADJ00000000 | 3 yrs      | 14G                 | yes                |                                                                                                                                                                           |                  |
| NQ4060 | NZ_CADK00000000 | 16 yrs     | 15/16G <sup>o</sup> | yes                |                                                                                                                                                                           |                  |
| NQ315  | NZ_CADE00000000 |            | 12G                 |                    | Isolates from Narino, Colombia                                                                                                                                            | Ref <sup>5</sup> |
| NQ1712 | NZ_CADF00000000 | 3 yrs      | 13G                 | yes                |                                                                                                                                                                           |                  |
| NQ352  | NZ_CADG00000000 |            | 12G <sup>o</sup>    |                    |                                                                                                                                                                           |                  |
| NQ1701 | NZ_CADH00000000 | 3 yrs      | 14G <sup>o</sup>    | no                 |                                                                                                                                                                           |                  |
| BM012A | NZ_CP006888.1   |            | 12G                 |                    |                                                                                                                                                                           |                  |
| BM012B | NZ_CP007605.1   | 44 d       | 11G                 | yes                | Isolate after re-infection of cured patient with strain BM012A<br>Spouse of patient with BM012A, natural transmission between spouses (timepoint of transmission unclear) |                  |
| BM012S | NZ_CP006889.1   | 5 mo       | 10G                 | yes                |                                                                                                                                                                           |                  |
| BM013A | NZ_CP007604.1   |            | 12G                 |                    | Isolate from asymptomatic human                                                                                                                                           | Ref <sup>8</sup> |
| BM013B | NZ_CP007606.1   | 20 d       | 12G                 | no                 | Isolate after re-infection of cured patient with strain BM013A                                                                                                            |                  |



|                       |               |       |                      |     |                                                                                                                                |                   |
|-----------------------|---------------|-------|----------------------|-----|--------------------------------------------------------------------------------------------------------------------------------|-------------------|
| <b>BCM-300</b>        | NZ_LT837687.1 |       | 14G                  |     | <i>cagA</i> -positive <i>H. pylori</i> strain                                                                                  | Ref <sup>9</sup>  |
| <b>HE136/09</b>       | NZ_LT635473.1 | 12 wk | 14G                  | no  | Re-isolates from five patients infected with BCM-300, placebo group                                                            |                   |
| <b>HE141/09</b>       | NZ_LT635471.1 | 12 wk | 15G                  | yes |                                                                                                                                |                   |
| <b>HE143/09</b>       | NZ_LT635458.1 | 12 wk | 14G                  | no  |                                                                                                                                |                   |
| <b>HE147/09</b>       | NZ_LT635477.1 | 12 wk | 14G                  | no  |                                                                                                                                |                   |
| <b>HE170/09</b>       | NZ_LT635472.1 | 12 wk | 14G                  | no  |                                                                                                                                |                   |
| <b>HE93/10</b>        | NZ_LT838273.1 | 12 wk | 13G                  | yes | Re-isolates from seven patients infected with BCM-300, patients were previously challenged with prophylactic vaccine candidate |                   |
| <b>HE101/09</b>       | NZ_LT635456.1 | 12 wk | 14G                  | no  |                                                                                                                                |                   |
| <b>HE132/09</b>       | NZ_LT635459.1 | 12 wk | 15G                  | yes |                                                                                                                                |                   |
| <b>HE134/09</b>       | NZ_LT635476.1 | 12 wk | 14G                  | no  |                                                                                                                                |                   |
| <b>HE142/09</b>       | NZ_LT635478.1 | 12 wk | 14G                  | no  |                                                                                                                                |                   |
| <b>HE171/09</b>       | NZ_LT635474.1 | 12 wk | 14G                  | no  |                                                                                                                                |                   |
| <b>HE178/09</b>       | NZ_LT635460.1 | 12 wk | 13G                  | yes |                                                                                                                                |                   |
| <b>Hp141</b>          |               |       | 12G-TGC <sup>#</sup> |     | Woman with gastritis in Poitiers, France                                                                                       | Ref <sup>10</sup> |
| <b>HP141*</b>         |               | 150 d | 10G-C <sup>#</sup>   | yes | Re-isolate from femal C57BL/6 inbred mice                                                                                      |                   |
| <b>HP145</b>          |               |       | 10G                  |     | Woman with prepyloric ulcer in Poitiers, France                                                                                | Ref <sup>10</sup> |
| <b>HP145*</b>         |               | 150 d | 10G                  | no  | Re-isolate from femal C57BL/6 inbred mice                                                                                      |                   |
| <b>HP87</b>           |               |       | 13G                  |     | Original human isolate                                                                                                         | Ref <sup>11</sup> |
| <b>HP87 P7*</b>       |               |       | 16/17/18G            | yes | Gerbil adapted strain                                                                                                          |                   |
| <b>HP87 P7</b>        |               |       | 16/17/18G            |     | <i>tlpD</i> mutant of gerbil adapted strain                                                                                    | Ref <sup>11</sup> |
| <b><i>tlpD</i></b>    |               |       |                      |     |                                                                                                                                |                   |
| <b>HP87 P7</b>        |               | 6 wk  | 16/17/18G            |     | Re-isolate from gerbil antrum                                                                                                  |                   |
| <b><i>tlpD</i> RI</b> |               |       |                      |     |                                                                                                                                |                   |

<sup>o</sup> The G-repeat length determined by Sanger sequencing differed from the genome sequence determined by 454- sequencing.

\* *H. pylori* isolates that were re-isolated from C57BL/6 inbred mice or gerbils.

<sup>#</sup> Additional nucleotide variations that were identified in the flanking region of the homopolymeric G-repeat.

Supplementary Table 4: Bacterial strains

| Name                                                                       | Description                                                                                                    | Strain number | <i>H. pylori</i>       | Resistance                                         |
|----------------------------------------------------------------------------|----------------------------------------------------------------------------------------------------------------|---------------|------------------------|----------------------------------------------------|
| WT / 26695                                                                 | Wildtype (NCBI Acc-no. NC_000915), kindly provided by T. F. Meyer (MPI-IB, Berlin, Germany); Ref <sup>12</sup> | CSS-0004      | 26695                  |                                                    |
| <sup>a</sup> $\Delta$ repG                                                 | <i>repG::aphA-3</i>                                                                                            | JVS-7014      | 26695                  | Kan <sup>R</sup>                                   |
| <sup>a</sup> C <sub>RepG</sub>                                             | <i>repG::aphA-3, rdxA::repG:catGC</i>                                                                          | CSS-0046      | 26695                  | Kan <sup>R</sup> Cm <sup>R</sup>                   |
| <sup>a</sup> SL 2                                                          | <i>repG::aphA-3, rdxA::repG-SL 2:catGC</i>                                                                     | CSS-0747      | 26695                  | Kan <sup>R</sup> Cm <sup>R</sup>                   |
| <sup>a</sup> $\Delta$ CU                                                   | <i>repG::aphA-3, rdxA::repG-<math>\Delta</math>CU:catGC</i>                                                    | CSS-0157      | 26695                  | Kan <sup>R</sup> Cm <sup>R</sup>                   |
| <sup>a</sup> $\Delta$ tlpB                                                 | <i>tlpB::rpsL-erm</i>                                                                                          | CSS-0163      | 26695                  | Erm <sup>R</sup>                                   |
| $\Delta$ hp0102                                                            | <i>hp0102::rpsL-erm</i>                                                                                        | CSS-1000      | 26695                  | Erm <sup>R</sup>                                   |
| $\Delta$ tlpB (Kan)                                                        | <i>tlpB::aphA-3</i>                                                                                            | CSS-5924      | 26695                  | Kan <sup>R</sup>                                   |
| $\Delta$ hp0102 (Kan)                                                      | <i>hp0102::aphA-3</i>                                                                                          | CSS-5942      | 26695                  | Kan <sup>R</sup>                                   |
| $\Delta$ tlpB-hp0102                                                       | <i>tlpB-hp0102::aphA-3</i>                                                                                     | CSS-5926      | 26695                  | Kan <sup>R</sup>                                   |
| $\Delta$ hp1284                                                            | <i>hp1284::aphA-3</i>                                                                                          | CSS-5928      | 26695                  | Kan <sup>R</sup>                                   |
| $\Delta$ hp1039                                                            | <i>hp1039::aphA-3</i>                                                                                          | CSS-5930      | 26695                  | Kan <sup>R</sup>                                   |
| $\Delta$ hp1581                                                            | <i>hp1581::aphA-3</i>                                                                                          | CSS-5932      | 26695                  | Kan <sup>R</sup>                                   |
| $\Delta$ hp0159                                                            | <i>hp0159::aphA-3</i>                                                                                          | CSS-5934      | 26695                  | Kan <sup>R</sup>                                   |
| $\Delta$ hp0826                                                            | <i>hp0826::aphA-3</i>                                                                                          | CSS-5936      | 26695                  | Kan <sup>R</sup>                                   |
| $\Delta$ hp0579-0580                                                       | <i>hp0579-0580::aphA-3</i>                                                                                     | CSS-5938      | 26695                  | Kan <sup>R</sup>                                   |
| $\Delta$ hp1206                                                            | <i>hp1206::aphA-3</i>                                                                                          | CSS-5940      | 26695                  | Kan <sup>R</sup>                                   |
| <sup>a</sup> <i>tlpB::3xFLAG*</i> / <i>tlpB</i> $\Delta$ G                 | <i>rpsL-str<sup>R</sup>, tlpB::tlpB-3xFLAG*, tlpB <math>\Delta</math>G::tlpB:rpsL-erm</i>                      | CSS-0471      | 26695 Str <sup>R</sup> | Str <sup>R</sup> Erm <sup>R</sup>                  |
| <sup>a</sup> <i>tlpB::3xFLAG*</i> / <i>tlpB</i> 6G                         | <i>rpsL-str<sup>R</sup>, tlpB::tlpB-3xFLAG*, tlpB 6G::tlpB:rpsL-erm</i>                                        | CSS-0472      | 26695 Str <sup>R</sup> | Str <sup>R</sup> Erm <sup>R</sup>                  |
| <sup>a</sup> <i>tlpB::3xFLAG*</i> / <i>tlpB</i> 7G                         | <i>rpsL-str<sup>R</sup>, tlpB::tlpB-3xFLAG*, tlpB 7G::tlpB:rpsL-erm</i>                                        | CSS-0473      | 26695 Str <sup>R</sup> | Str <sup>R</sup> Erm <sup>R</sup>                  |
| <sup>a</sup> <i>tlpB::3xFLAG*</i> / <i>tlpB</i> 8G                         | <i>rpsL-str<sup>R</sup>, tlpB::tlpB-3xFLAG*, tlpB 8G::tlpB:rpsL-erm</i>                                        | CSS-0474      | 26695 Str <sup>R</sup> | Str <sup>R</sup> Erm <sup>R</sup>                  |
| <sup>a</sup> <i>tlpB::3xFLAG*</i> / <i>tlpB</i> 9G                         | <i>rpsL-str<sup>R</sup>, tlpB::tlpB-3xFLAG*, tlpB 9G::tlpB:rpsL-erm</i>                                        | CSS-0475      | 26695 Str <sup>R</sup> | Str <sup>R</sup> Erm <sup>R</sup>                  |
| <sup>a</sup> <i>tlpB-3xFLAG*</i> / <i>tlpB</i> 10G                         | <i>rpsL-str<sup>R</sup>, tlpB::tlpB-3xFLAG*, tlpB 10G::tlpB:rpsL-erm</i>                                       | CSS-0476      | 26695 Str <sup>R</sup> | Str <sup>R</sup> Erm <sup>R</sup>                  |
| <sup>a</sup> <i>tlpB::3xFLAG*</i> / <i>tlpB</i> 11G                        | <i>rpsL-str<sup>R</sup>, tlpB::tlpB-3xFLAG*, tlpB 11G::tlpB:rpsL-erm</i>                                       | CSS-0477      | 26695 Str <sup>R</sup> | Str <sup>R</sup> Erm <sup>R</sup>                  |
| <sup>a</sup> <i>tlpB::3xFLAG*</i> / <i>tlpB</i> WT (12G)                   | <i>rpsL-str<sup>R</sup>, tlpB::tlpB-3xFLAG*, tlpB 12G::tlpB:rpsL-erm</i>                                       | CSS-0470      | 26695 Str <sup>R</sup> | Str <sup>R</sup> Erm <sup>R</sup>                  |
| <sup>a</sup> <i>tlpB::3xFLAG*</i> / <i>tlpB</i> 13G                        | <i>rpsL-str<sup>R</sup>, tlpB::tlpB-3xFLAG*, tlpB 13G::tlpB:rpsL-erm</i>                                       | CSS-0478      | 26695 Str <sup>R</sup> | Str <sup>R</sup> Erm <sup>R</sup>                  |
| <sup>a</sup> <i>tlpB::3xFLAG*</i> / <i>tlpB</i> 14G                        | <i>rpsL-str<sup>R</sup>, tlpB::tlpB-3xFLAG*, tlpB 14G::tlpB:rpsL-erm</i>                                       | CSS-0479      | 26695 Str <sup>R</sup> | Str <sup>R</sup> Erm <sup>R</sup>                  |
| <sup>a</sup> <i>tlpB::3xFLAG*</i> / <i>tlpB</i> 15G                        | <i>rpsL-str<sup>R</sup>, tlpB::tlpB-3xFLAG*, tlpB 15G::tlpB:rpsL-erm</i>                                       | CSS-0480      | 26695 Str <sup>R</sup> | Str <sup>R</sup> Erm <sup>R</sup>                  |
| <sup>a</sup> <i>tlpB::3xFLAG*</i> / <i>tlpB</i> 16G                        | <i>rpsL-str<sup>R</sup>, tlpB::tlpB-3xFLAG*, tlpB 16G::tlpB:rpsL-erm</i>                                       | CSS-0481      | 26695 Str <sup>R</sup> | Str <sup>R</sup> Erm <sup>R</sup>                  |
| <sup>a</sup> <i>tlpB::3xFLAG*</i> / $\Delta$ repG / <i>tlpB</i> $\Delta$ G | <i>rpsL-str<sup>R</sup>, tlpB::tlpB-3xFLAG*, repG::aphA-3, tlpB <math>\Delta</math>G::tlpB:rpsL-erm</i>        | CSS-0483      | 26695 Str <sup>R</sup> | Str <sup>R</sup> Erm <sup>R</sup> Kan <sup>R</sup> |

|                                                                                   |                                                                                             |          |                        |                                                    |
|-----------------------------------------------------------------------------------|---------------------------------------------------------------------------------------------|----------|------------------------|----------------------------------------------------|
| <b><i>ΔtlpB::3xFLAG*/ ΔrepG / tlpB 6G</i></b>                                     | <i>rpsL-str<sup>R</sup>, tlpB::tlpB-3xFLAG*, repG::aphA-3, tlpB 6G::tlpB:rpsL-erm</i>       | CSS-0484 | 26695 Str <sup>R</sup> | Str <sup>R</sup> Erm <sup>R</sup> Kan <sup>R</sup> |
| <b><i>ΔtlpB::3xFLAG*/ ΔrepG / tlpB 7G</i></b>                                     | <i>rpsL-str<sup>R</sup>, tlpB::tlpB-3xFLAG*, repG::aphA-3, tlpB 7G::tlpB:rpsL-erm</i>       | CSS-0485 | 26695 Str <sup>R</sup> | Str <sup>R</sup> Erm <sup>R</sup> Kan <sup>R</sup> |
| <b><i>ΔtlpB::3xFLAG*/ ΔrepG / tlpB 8G</i></b>                                     | <i>rpsL-str<sup>R</sup>, tlpB::tlpB-3xFLAG*, repG::aphA-3, tlpB 8G::tlpB:rpsL-erm</i>       | CSS-0486 | 26695 Str <sup>R</sup> | Str <sup>R</sup> Erm <sup>R</sup> Kan <sup>R</sup> |
| <b><i>ΔtlpB::3xFLAG*/ ΔrepG / tlpB 9G</i></b>                                     | <i>rpsL-str<sup>R</sup>, tlpB::tlpB-3xFLAG*, repG::aphA-3, tlpB 9G::tlpB:rpsL-erm</i>       | CSS-0487 | 26695 Str <sup>R</sup> | Str <sup>R</sup> Erm <sup>R</sup> Kan <sup>R</sup> |
| <b><i>ΔtlpB::3xFLAG*/ ΔrepG / tlpB 10G</i></b>                                    | <i>rpsL-str<sup>R</sup>, tlpB::tlpB-3xFLAG*, repG::aphA-3, tlpB 10G::tlpB:rpsL-erm</i>      | CSS-0488 | 26695 Str <sup>R</sup> | Str <sup>R</sup> Erm <sup>R</sup> Kan <sup>R</sup> |
| <b><i>ΔtlpB::3xFLAG*/ ΔrepG / tlpB 11G</i></b>                                    | <i>rpsL-str<sup>R</sup>, tlpB::tlpB-3xFLAG*, repG::aphA-3, tlpB 11G::tlpB:rpsL-erm</i>      | CSS-0489 | 26695 Str <sup>R</sup> | Str <sup>R</sup> Erm <sup>R</sup> Kan <sup>R</sup> |
| <b><i>ΔtlpB::3xFLAG*/ ΔrepG / tlpB WT (12G)</i></b>                               | <i>rpsL-str<sup>R</sup>, tlpB::tlpB-3xFLAG*, repG::aphA-3, tlpB 12G::tlpB:rpsL-erm</i>      | CSS-0482 | 26695 Str <sup>R</sup> | Str <sup>R</sup> Erm <sup>R</sup> Kan <sup>R</sup> |
| <b><i>ΔtlpB::3xFLAG*/ ΔrepG / tlpB 13G</i></b>                                    | <i>rpsL-str<sup>R</sup>, tlpB::tlpB-3xFLAG*, repG::aphA-3, tlpB 13G::tlpB:rpsL-erm</i>      | CSS-0490 | 26695 Str <sup>R</sup> | Str <sup>R</sup> Erm <sup>R</sup> Kan <sup>R</sup> |
| <b><i>ΔtlpB::3xFLAG*/ ΔrepG / tlpB 14G</i></b>                                    | <i>rpsL-str<sup>R</sup>, tlpB::tlpB-3xFLAG*, repG::aphA-3, tlpB 14G::tlpB:rpsL-erm</i>      | CSS-0491 | 26695 Str <sup>R</sup> | Str <sup>R</sup> Erm <sup>R</sup> Kan <sup>R</sup> |
| <b><i>ΔtlpB::3xFLAG*/ ΔrepG / tlpB 15G</i></b>                                    | <i>rpsL-str<sup>R</sup>, tlpB::tlpB-3xFLAG*, repG::aphA-3, tlpB 15G::tlpB:rpsL-erm</i>      | CSS-0492 | 26695 Str <sup>R</sup> | Str <sup>R</sup> Erm <sup>R</sup> Kan <sup>R</sup> |
| <b><i>ΔtlpB::3xFLAG*/ ΔrepG / tlpB 16G</i></b>                                    | <i>rpsL-str<sup>R</sup>, tlpB::tlpB-3xFLAG*, repG::aphA-3, tlpB 16G::tlpB:rpsL-erm</i>      | CSS-0493 | 26695 Str <sup>R</sup> | Str <sup>R</sup> Erm <sup>R</sup> Kan <sup>R</sup> |
| <b><i>tlpB-hp0102 10<sup>th</sup>::gfpmut3</i></b>                                | <i>rdxA::tlpB-hp0102 10<sup>th</sup>-gfpmut3:catGC</i>                                      | CSS-2104 | G27                    | Cm <sup>R</sup>                                    |
| <b><i>tlpB-hp0102 10<sup>th</sup>::gfpmut3 / ΔrepG</i></b>                        | <i>repG::aphA-3, rdxA::tlpB-hp0102 10<sup>th</sup>-gfpmut3:catGC</i>                        | CSS-2107 | G27                    | Cm <sup>R</sup> Kan <sup>R</sup>                   |
| <b><i>tlpB<sub>mini</sub>-hp0102 10<sup>th</sup>::gfpmut3</i></b>                 | <i>rdxA::tlpB<sub>mini</sub>-hp0102 10<sup>th</sup>-gfpmut3:catGC</i>                       | CSS-2116 | G27                    | Cm <sup>R</sup>                                    |
| <b><i>tlpB<sub>mini</sub>-hp0102 10<sup>th</sup>::gfpmut3 / ΔrepG</i></b>         | <i>repG::aphA-3, rdxA::tlpB<sub>mini</sub>-hp0102 10<sup>th</sup>-gfpmut3:catGC</i>         | CSS-2119 | G27                    | Cm <sup>R</sup> Kan <sup>R</sup>                   |
| <b><i>P<sub>tlpB</sub>hp0102 10<sup>th</sup>::gfpmut3</i></b>                     | <i>rdxA::P<sub>tlpB</sub>hp0102 10<sup>th</sup>-gfpmut3:catGC</i>                           | CSS-2138 | G27                    | Cm <sup>R</sup>                                    |
| <b><i>P<sub>tlpB</sub>hp0102 10<sup>th</sup>::gfpmut3 / ΔrepG</i></b>             | <i>repG::aphA-3, rdxA::P<sub>tlpB</sub>hp0102 10<sup>th</sup>-gfpmut3:catGC</i>             | CSS-2141 | G27                    | Cm <sup>R</sup> Kan <sup>R</sup>                   |
| <b><i>tlpB-hp0102 10<sup>th</sup>::gfpmut3 ΔG<sup>hp0102</sup></i></b>            | <i>rdxA::tlpB-hp0102 10<sup>th</sup>-gfpmut3 ΔG<sup>hp0102</sup>:catGC</i>                  | CSS-2150 | G27                    | Cm <sup>R</sup>                                    |
| <b><i>tlpB-hp0102 10<sup>th</sup>::gfpmut3 ΔG<sup>hp0102</sup> / ΔrepG</i></b>    | <i>repG::aphA-3, rdxA::tlpB-hp0102 10<sup>th</sup>-gfpmut3 ΔG<sup>hp0102</sup>:catGC</i>    | CSS-2153 | G27                    | Cm <sup>R</sup> Kan <sup>R</sup>                   |
| <b><i>tlpB-hp0102 10<sup>th</sup>::gfpmut3 ATTTA<sup>hp0102</sup></i></b>         | <i>rdxA::tlpB-hp0102 10<sup>th</sup>-gfpmut3 ATTTA<sup>hp0102</sup>:catGC</i>               | CSS-2156 | G27                    | Cm <sup>R</sup>                                    |
| <b><i>tlpB-hp0102 10<sup>th</sup>::gfpmut3 ATTTA<sup>hp0102</sup> / ΔrepG</i></b> | <i>repG::aphA-3, rdxA::tlpB-hp0102 10<sup>th</sup>-gfpmut3 ATTTA<sup>hp0102</sup>:catGC</i> | CSS-2159 | G27                    | Cm <sup>R</sup> Kan <sup>R</sup>                   |
| <b><i>tlpB<sub>stop</sub>-hp0102 10<sup>th</sup>::gfpmut3</i></b>                 | <i>rdxA::tlpB<sub>stop</sub>-hp0102 10<sup>th</sup>-gfpmut3:catGC</i>                       | CSS-3241 | G27                    | Cm <sup>R</sup>                                    |
| <b><i>tlpB<sub>stop</sub>-hp0102 10<sup>th</sup>::gfpmut3 / ΔrepG</i></b>         | <i>repG::aphA-3, rdxA::tlpB<sub>stop</sub>-hp0102 10<sup>th</sup>-gfpmut3:catGC</i>         | CSS-3244 | G27                    | Cm <sup>R</sup> Kan <sup>R</sup>                   |
| <b>X47-2AL</b>                                                                    | Wildtype (DDBJ/EMBL/GenBank Acc-no. AWNG00000000, AWNG01000000); Ref <sup>13</sup>          | CSS-0996 | X47-2AL                |                                                    |
| <b>X47-2AL ΔrepG</b>                                                              | <i>repG::aphA-3</i>                                                                         | CSS-0997 | X47-2AL                | Kan <sup>R</sup>                                   |
| <b>X47-2AL ΔtlpB</b>                                                              | <i>tlpB::aac(3)-IV</i>                                                                      | CSS-1123 | X47-2AL                | Gen <sup>R</sup>                                   |
| <b>X47-2AL ΔtlpB / ΔrepG</b>                                                      | <i>tlpB::aac(3)-IV, repG::aphA-3</i>                                                        | CSS-1769 | X47-2AL                | Gen <sup>R</sup> Kan <sup>R</sup>                  |
| <b>X47-2AL ΔtlpB-hp0102</b>                                                       | <i>tlpB-hp0102::aac(3)-IV</i>                                                               | CSS-1743 | X47-2AL                | Gen <sup>R</sup>                                   |
| <b>X47-2AL ΔtlpB-hp0102 / ΔrepG</b>                                               | <i>tlpB-hp0102::aac(3)-IV, repG::aphA-3</i>                                                 | CSS-1773 | X47-2AL                | Gen <sup>R</sup> Kan <sup>R</sup>                  |
| <b>X47-2AL ΔtlpB-hp0102 + tlpB-hp0102</b>                                         | <i>tlpB-hp0102::aac(3)-IV, rdxA::tlpB-hp0102:aphA-3</i>                                     | CSS-2046 | X47-2AL                | Gen <sup>R</sup> Kan <sup>R</sup>                  |
| <b>X47-2AL ΔtlpB-hp0102 + hp0102</b>                                              | <i>tlpB-hp0102::aac(3)-IV, rdxA::hp0102:aphA-3</i>                                          | CSS-2080 | X47-2AL                | Gen <sup>R</sup> Kan <sup>R</sup>                  |
| <b>X47-2AL Δhp0102</b>                                                            | <i>hp0102::aac(3)-IV</i>                                                                    | CSS-2019 | X47-2AL                | Gen <sup>R</sup>                                   |
| <b>X47-2AL Δhp0102 / ΔrepG</b>                                                    | <i>hp0102::aac(3)-IV, repG::aphA-3</i>                                                      | CSS-2022 | X47-2AL                | Gen <sup>R</sup> Kan <sup>R</sup>                  |
| <b>X47-2AL Δhp0102 + hp0102</b>                                                   | <i>hp0102::aac(3)-IV, rdxA::hp0102:aphA-3</i>                                               | CSS-2087 | X47-2AL                | Gen <sup>R</sup> Kan <sup>R</sup>                  |

|                                                |                                                                                                                                                                                                                                   |          |                |                  |
|------------------------------------------------|-----------------------------------------------------------------------------------------------------------------------------------------------------------------------------------------------------------------------------------|----------|----------------|------------------|
| <b>X47-2AL <math>\Delta</math>hp1284</b>       | <i>hp1284::aac(3)-IV</i>                                                                                                                                                                                                          | CSS-5910 | X47-2AL        | Gen <sup>R</sup> |
| <b>X47-2AL <math>\Delta</math>hp1039</b>       | <i>hp1039::aac(3)-IV</i>                                                                                                                                                                                                          | CSS-5912 | X47-2AL        | Gen <sup>R</sup> |
| <b>X47-2AL <math>\Delta</math>hp1581</b>       | <i>hp1581::aac(3)-IV</i>                                                                                                                                                                                                          | CSS-5914 | X47-2AL        | Gen <sup>R</sup> |
| <b>X47-2AL <math>\Delta</math>hp0159</b>       | <i>hp0159::aac(3)-IV</i>                                                                                                                                                                                                          | CSS-5916 | X47-2AL        | Gen <sup>R</sup> |
| <b>X47-2AL <math>\Delta</math>hp0826</b>       | <i>hp0826::aac(3)-IV</i>                                                                                                                                                                                                          | CSS-5918 | X47-2AL        | Gen <sup>R</sup> |
| <b>X47-2AL <math>\Delta</math>hp0579-580</b>   | <i>hp0579-580::aac(3)-IV</i>                                                                                                                                                                                                      | CSS-5920 | X47-2AL        | Gen <sup>R</sup> |
| <b>X47-2AL <math>\Delta</math>hp1206</b>       | <i>hp1206::aac(3)-IV</i>                                                                                                                                                                                                          | CSS-5922 | X47-2AL        | Gen <sup>R</sup> |
| <b>G27</b>                                     | Wildtype (NCBI Acc-no. NC_011333), kindly provided by T. F. Meyer; Ref <sup>14</sup>                                                                                                                                              | CSS-0010 | G27            |                  |
| <b><sup>a</sup>G27 <math>\Delta</math>repG</b> | <i>repG::aphA-3</i>                                                                                                                                                                                                               | CSS-0169 | G27            | Kan <sup>R</sup> |
| <b>G27 <math>\Delta</math>hp0102</b>           | <i>hp0102::rpsL-erm</i>                                                                                                                                                                                                           | CSS-1007 | G27            | Erm <sup>R</sup> |
| <b>J99</b>                                     | Wildtype (NCBI Acc-no. NC_000921), kindly provided by T. F. Meyer, MPI-IB, Berlin, Germany; Ref <sup>15</sup>                                                                                                                     | CSS-0001 | J99            |                  |
| <b><sup>a</sup>J99 <math>\Delta</math>repG</b> | <i>repG::aphA-3</i>                                                                                                                                                                                                               | CSS-0732 | J99            | Kan <sup>R</sup> |
| <b>J99 <math>\Delta</math>hp0102</b>           | <i>hp0102::rpsL-erm</i>                                                                                                                                                                                                           | CSS-1019 | J99            | Erm <sup>R</sup> |
| <b>TOP 10</b>                                  | <i>mcrA <math>\Delta</math>(mrr-hsdRMS-mcrBC) <math>\Phi</math>80lacZ<math>\Delta</math>M15 <math>\Delta</math>lacX74recA1araD139 <math>\Delta</math>(ara-leu)7697galUgalK <math>\lambda</math>-tpsLendA1nupG from Invitrogen</i> | CSO-0296 | <i>E. coli</i> |                  |

Str<sup>R</sup>: streptomycin resistant; Kan<sup>R</sup>: kanamycin resistant; Cm<sup>R</sup>: chloramphenicol resistant; Erm<sup>R</sup>: erythromycin resistant; Gen<sup>R</sup>: gentamicin resistant

<sup>a</sup> Mutant strains were constructed as described in Ref<sup>2</sup>

**Supplementary Table 5: DNA oligonucleotides.** Sequences are given in 5' → 3' direction; P~ denotes a 5' monophosphate.

| Name     | Sequence 5' → 3'                             | Description                                                   |
|----------|----------------------------------------------|---------------------------------------------------------------|
| CSO-0003 | GAAAGGAGGGGAGGT                              | Northern blot probe for RepG                                  |
| CSO-0017 | gTTTTCTAGAGATCAGCCTGCCTTTAGG                 | RepG cloning                                                  |
| CSO-0018 | gTTTTCTCGAGCTTAGCGCTTAATGAAACGC              | RepG cloning                                                  |
| CSO-0039 | gTTTTCTCGAGTCTCAAATCCGCTGAAATCT              | Cloning of <i>tlpB</i>                                        |
| CSO-0040 | gTTTTCTAGATCAGTTGCAACCAGGAGATT               | Cloning of <i>tlpB</i>                                        |
| CSO-0051 | TGCACTTATATTTACAAGTTCGCT                     | Verification of <i>tlpB</i> deletion                          |
| CSO-0086 | gTTTTATGCATAGGACTTTGAATGTCAAATCCATT          | Verification/Sequencing of <i>tlpB-hp0102</i> , <i>hp0102</i> |
| CSO-0146 | gTTTTATCGATGTATGCTCTTTAAGACCCAGC             | Cloning GFP fusion, <i>tlpB-hp0102</i>                        |
| CSO-0147 | gTTTTCATATGCTCGAATTCAGATCCACGTT              | Cloning GFP fusion, <i>tlpB-hp0102</i>                        |
| CSO-0205 | AATTACAACAGTACTGCGATGAGT                     | Verification/Sequencing of GFP fusions                        |
| CSO-0206 | AATCTCACGCCAAGCATT                           | Verification/Sequencing of <i>tlpB-hp0102</i> , <i>hp0102</i> |
| CSO-0207 | AGTTCTGATTCATGCCCTT                          | Verification/Sequencing of <i>tlpB-hp0102</i> , <i>hp0102</i> |
| CSO-0263 | GACTGATGTCATCAGCGGT                          | Cloning of <i>tlpB</i>                                        |
| CSO-0293 | gTTTTGAATTcTCCAACGTCATCTCGTTCT               | Cloning of <i>tlpB</i> , <i>tlpB-hp0102</i>                   |
| CSO-0309 | gTTTTGAATTCCTACTTATTAATAATTTATAGCTATTGAAAAGA | Cloning of <i>tlpB</i> , <i>hp0102</i>                        |
| CSO-0581 | gTTTTATCGATTTATTATTTTATCTTTAAGCCTAACTTAA     | Cloning of GFP fusion                                         |
| CSO-0683 | gTTTTTGCTAGCAGTAAAGGAGAAGAACTTTTCACTGGA      | Cloning of GFP fusion                                         |
| CSO-0867 | AGCCATTTATGAACGCTACGGC                       | Quantitative RT-PCR ( <i>hp0102</i> )                         |
| CSO-0868 | CACCACAAACAAGCGGATGAT                        | Quantitative RT-PCR ( <i>hp0102</i> )                         |
| CSO-0869 | gTTTTGGATCCAACCCTTTTTAATAAACTCC              | Cloning <i>hp0102</i>                                         |
| CSO-0870 | gTTTTCTCGAGTTATCAATGATATTGCCGATCAAAC         | Cloning <i>hp0102</i>                                         |
| CSO-0871 | gTTTTGAATTCATGCTTTTAAAATACCCTAG              | Cloning <i>hp0102</i> , <i>tlpB-hp0102</i>                    |
| CSO-0872 | gTTTTCTAGATTTGGATACTATTTCGCAAGC              | Cloning <i>hp0102</i>                                         |
| CSO-0873 | gTTTTCTAGAGGCATCAAATAAAACGAAA                | Cloning <i>hp0102</i>                                         |
| CSO-0874 | gTTTTCTCGAGGTGAAGACGAAAGG                    | Cloning <i>hp0102</i> , <i>tlpB-hp0102</i>                    |
| CSO-0940 | gTTTTGGATCCCAGCGATTTCTTCTAATTCTGT            | Cloning <i>tlpB-hp0102</i>                                    |
| CSO-0941 | gTTTTGGATCCACAAGCTGAAATTATAGAACC             | Cloning <i>tlpB-hp0102</i>                                    |
| CSO-0942 | gTTTTGAATTCAGGGGGAGTTTATTAATAAAAG            | Cloning of <i>tlpB</i>                                        |
| CSO-1173 | GGTAGTGGTTTTGTGTGATGG                        | Quantitative RT-PCR (6S RNA)                                  |
| CSO-1174 | CCAGATGACCGCTACTTTTACA                       | Quantitative RT-PCR (6S RNA)                                  |
| CSO-1359 | gTTTTCTCGAGTTTGGATACTATTTCGCAAGC             | Cloning <i>hp0102</i> , <i>tlpB-hp0102</i>                    |

|           |                                               |                                                         |
|-----------|-----------------------------------------------|---------------------------------------------------------|
| CSO-1737  | gTTTTCTAGATTATCAATGATATTGCCGATCAAAC           | Cloning <i>hp0102</i>                                   |
| CSO-1738  | TGCAAAGAGAGCAAGGATGC                          | Verification of <i>hp0102</i> deletion                  |
| CSO-1739  | gTTTTGGATCCAACACGCCGTGATCACAGAA               | Cloning <i>hp0102</i>                                   |
| CSO-1740  | gTTTTCATATGTAAGATTTTTATTTTATTTTAAAGCCTAAC     | Cloning <i>tlpB-hp0102</i>                              |
| CSO-1741  | gTTTTATCGATAGTTAGGGATTGAAATACCCTTA            | Cloning <i>tlpB-hp0102</i>                              |
| CSO-1742  | AGCTAAAATTATAGAACACCCTTTT                     | Cloning <i>hp0102</i>                                   |
| CSO-1743  | P~TCAGGGGGAGTTTATCAAAAAAG                     | Cloning <i>hp0102</i>                                   |
| CSO-1745  | CATTTATCTCCTATAAATCATTTTTAAGT                 | Cloning of <i>tlpB</i>                                  |
| CSO-1803  | gTTTTGCTAGCACACGCCGTGATCACAGAAA               | Cloning of GFP fusion                                   |
| CSO-1813  | gTTTTGGATCCTTTTATGGATAATTTTAAATCATTTG         | Cloning <i>tlpB-hp0102</i>                              |
| CSO-1814  | gTTTTGCTAGCTATTCCTCCAGGTAATAAACA              | Cloning <i>tlpB-hp0102</i>                              |
| CSO-1984  | GGCTAACACGACCAGCATGA                          | Cloning of GFP fusion                                   |
| CSO-1985  | P~TAATCAGGGGGAGTTTATTAATAAAG                  | Cloning of GFP fusion                                   |
| CSO-2052  | P~AGTTTATTAATAAAGGGTTGGATTG                   | Cloning of GFP fusion                                   |
| CSO-2053  | TGATTAAGTTTTAAACAAATCACTTGT                   | Cloning of GFP fusion                                   |
| CSO-2055  | P~TCAGGGGGAGTTTATTAATAAAGG                    | Cloning of GFP fusion                                   |
| CSO-2056  | AGCTGAAATTATAGAACACCCTTTTT                    | Cloning of GFP fusion                                   |
| CSO-2061  | P~ATTTAAGTTTATTAATAAAGGGTTGGATTG              | Cloning of GFP fusion                                   |
| CSO-2274  | TTGAAGAAAATTACTATTATCTCCTATAAATCATTTTTAAGTCAA | Cloning of GFP fusion                                   |
| CSO-2275  | TAGGAGATAATAGTAATTTCTTCAATGTTTGCTTCGTTG       | Cloning of GFP fusion                                   |
| CSO-3195  | gTTTTGGATCCGACTGATGCATCAGCGGT                 | Cloning <i>hp0102</i>                                   |
| CSO-SP001 | TCGCGGCTATAACTTTGATATG                        | Cloning of <i>tlpB</i> (Kan) in 26695                   |
| CSO-SP004 | CCATAAAGCAAGTTTTAGGGT                         | Cloning of <i>tlpB</i> (Kan) in 26695                   |
| CSO-SP008 | TAGAGATCCGCATATTGTGTT                         | Amplification of <i>aac(3)-IV</i> cassette              |
| CSO-SP009 | TCCAACGTCATCTCGTTCTC                          | Amplification of <i>aac(3)-IV</i> cassette              |
| CSO-SP010 | ATGGATTTTATAGGGTTTGAAGATT                     | Cloning of <i>hp1284</i> in 26695 and X47               |
| CSO-SP013 | AATCAAACCCATATCGTTTGGAGC                      | Cloning of <i>hp1284</i> in 26695 and X47               |
| CSO-SP014 | GCCATAAAAGCATGGCAGA                           | Verification of <i>hp1284</i> deletion in 26695 and X47 |
| CSO-SP015 | ATGGCTCACTCTGCTTTTTTGG                        | Cloning of <i>hp1039</i> in 26695 and X47               |
| CSO-SP018 | ATCATTCTACAAAAAACTTCCC                        | Cloning of <i>hp1039</i> in 26695 and X47               |
| CSO-SP019 | CTTTAACTCAAGTCTTGTTGATTG                      | Verification of <i>hp1039</i> deletion in 26695 and X47 |
| CSO-SP020 | ATGCTTTTTGTGGATAACGCTAAT                      | Cloning of <i>hp1581</i> in 26695 and X47               |
| CSO-SP023 | CATCGCCAATCTCTTCTAAATG                        | Cloning of <i>hp1581</i> in 26695 and X47               |
| CSO-SP024 | GCTATAATAGTGAAAATACTAAATCCA                   | Verification of <i>hp1581</i> deletion in 26695 and X47 |
| CSO-SP025 | TTGCGTGTTTTGCCATTTCTTTAA                      | Cloning of <i>hp0826</i> in 26695 and X47               |

|           |                                                   |                                                             |
|-----------|---------------------------------------------------|-------------------------------------------------------------|
| CSO-SP028 | GAAGCTAATCCTAAAAAGTCTTAGT                         | Cloning of <i>hp0826</i> in 26695 and X47                   |
| CSO-SP029 | GTTTTTAGTTGGATATTTAATCATCAAAT                     | Verification of <i>hp0826</i> deletion in 26695 and X47     |
| CSO-SP030 | ATGAGTATTATTATTCCTATTGTCATC                       | Cloning of <i>hp0159</i> in 26695 and X47                   |
| CSO-SP033 | CGTTTGAAAATCCTATTCAATCTAAA                        | Cloning of <i>hp0159</i> in 26695 and X47                   |
| CSO-SP034 | ACCCAATCTAATTGGTTATTATAG                          | Verification of <i>hp0159</i> deletion in 26695 and X47     |
| CSO-SP035 | ATCTTGGAACCTTCAAGAAATCG                           | Cloning of <i>hp0579-580</i> in 26695 and X47               |
| CSO-SP038 | ACAACCTTTTTTAAACAAGAGATAAAG                       | Cloning of <i>hp0579-580</i> in 26695 and X47               |
| CSO-SP039 | TGCCCAGTAAAAAAGCGCGTT                             | Verification of <i>hp0579-580</i> deletion in 26695 and X47 |
| CSO-SP040 | CTACTTTAAAATACTTTTTGCGCTC                         | Cloning of <i>hp1206</i> in 26695 and X47                   |
| CSO-SP043 | TTAGCCGAGATTGTCTTTGTGTT                           | Cloning of <i>hp1206</i> in 26695 and X47                   |
| CSO-SP044 | TAGCTATAATCTAGCTCAATTTGG                          | Verification of <i>hp1206</i> deletion in 26695 and X47     |
| CSO-SP047 | AACACAATATGGCGGATCTCTAGTTAGGGAGGTTGTGATCTTTA      | Cloning of <i>hp1284</i> in X47                             |
| CSO-SP048 | GAGAACGAGATGACGTTGGAAATCGCATGGAAACTTAAAGACAA      | Cloning of <i>hp1284</i> in X47                             |
| CSO-SP049 | AACACAATATGGCGGATCTCTACCAATGGTTTGAGCGATTTTTTG     | Cloning of <i>hp1039</i> in X47                             |
| CSO-SP050 | GAGAACGAGATGACGTTGGAGTTATATGGTGGTCGTGAGTC         | Cloning of <i>hp1039</i> in X47                             |
| CSO-SP051 | AACACAATATGGCGGATCTCTACCTAAAAAATCTTTCCTAAAGGGA    | Cloning of <i>hp1581</i> in X47                             |
| CSO-SP052 | GAGAACGAGATGACGTTGGATATTTTTGGGTTTGGTGTGCG         | Cloning of <i>hp1581</i> in X47                             |
| CSO-SP053 | AACACAATATGGCGGATCTCTATATCTCGTGGTTTTATGGCTC       | Cloning of <i>hp0826</i> in X47                             |
| CSO-SP054 | GAGAACGAGATGACGTTGGACAAGAGCGTGTGGGGATCA           | Cloning of <i>hp0826</i> in X47                             |
| CSO-SP055 | AACACAATATGGCGGATCTCTAGCCGCTCCAAAATAATAGCC        | Cloning of <i>hp0159</i> in X47                             |
| CSO-SP056 | GAGAACGAGATGACGTTGGATCCCTTTATGAGCATTACCTTAAT      | Cloning of <i>hp0159</i> in X47                             |
| CSO-SP057 | AACACAATATGGCGGATCTCTACAACTTAAAACGAATCGGCTCT      | Cloning of <i>hp0579-580</i> in X47                         |
| CSO-SP058 | GAGAACGAGATGACGTTGGATCAAAAATAAGCCATTGGGTTTGA      | Cloning of <i>hp0579-580</i> in X47                         |
| CSO-SP059 | AACACAATATGGCGGATCTCTAGGAGTAGAAAAAACGATCACAG      | Cloning of <i>hp1206</i> in X47                             |
| CSO-SP060 | GAGAACGAGATGACGTTGGAAGCGGATATTATTATGGGGCTTA       | Cloning of <i>hp1206</i> in X47                             |
| CSO-SP061 | ATTCTTCAGATATTTTAAACATCGCTAC                      | RT-PCR ( <i>tlpB-hp0102</i> )                               |
| CSO-SP062 | TATAAGTTTGATGAAGCACGGAAAGA                        | RT-PCR ( <i>tlpB-hp0102</i> )                               |
| CSO-SP063 | TCCTAGTTAGTCACCCGGGTAAAAACAAGCTGAAATTATAGAACACC   | Cloning of <i>tlpB-hp0102</i> in 26695                      |
| CSO-SP064 | ATTGTTTTAGTACCTGGAGGGAATAATGGAACGACCATGAATTTAGAC  | Cloning of <i>tlpB-hp0102</i> in 26695                      |
| CSO-SP065 | ATTGTTTTAGTACCTGGAGGGAATAATGAGTGAAAAAGATGAGGGCAT  | Cloning of <i>hp0102</i> in 26695                           |
| CSO-SP066 | TCCTAGTTAGTCACCCGGGTAGTTAGGGAGGTTGTGATCTTTA       | Cloning of <i>hp1284</i> in 26695                           |
| CSO-SP067 | ATTGTTTTAGTACCTGGAGGGAATAAATCGCATGGAAACTTAAAGACAA | Cloning of <i>hp1284</i> in 26695                           |
| CSO-SP068 | TCCTAGTTAGTCACCCGGGTACCAATGGTTTGAGCGATTTTTTG      | Cloning of <i>hp1039</i> in 26695                           |
| CSO-SP069 | ATTGTTTTAGTACCTGGAGGGAATAGTTATATGGTGGTCGTGAGTC    | Cloning of <i>hp1039</i> in 26695                           |
| CSO-SP070 | TCCTAGTTAGTCACCCGGGTACCTAAAAAATCTTTCCTAAAGGGA     | Cloning of <i>hp1581</i> in 26695                           |

|                   |                                                   |                                                                 |
|-------------------|---------------------------------------------------|-----------------------------------------------------------------|
| <b>CSO-SP071</b>  | ATTGTTTTAGTACCTGGAGGGAATATATTTTTGGGTTTGGTGTGCG    | Cloning of <i>hp1581</i> in 26695                               |
| <b>CSO-SP072</b>  | TCCTAGTTAGTCACCCGGGTATATCTCGTGGTTTTATGGCTC        | Cloning of <i>hp0826</i> in 26695                               |
| <b>CSO-SP073</b>  | ATTGTTTTAGTACCTGGAGGGAATACAAGAGCGTGTGGGGATCA      | Cloning of <i>hp0826</i> in 26695                               |
| <b>CSO-SP074</b>  | TCCTAGTTAGTCACCCGGGTAGCCGCTCCAAAATAATAGCC         | Cloning of <i>hp0159</i> in 26695                               |
| <b>CSO-SP075</b>  | ATTGTTTTAGTACCTGGAGGGAATATCCCTTTATGAGCATTACCTTAAT | Cloning of <i>hp0159</i> in 26695                               |
| <b>CSO-SP076</b>  | TCCTAGTTAGTCACCCGGGTACAAACTTAAAACGAATCGGCTCT      | Cloning of <i>hp0579-580</i> in 26695                           |
| <b>CSO-SP077</b>  | ATTGTTTTAGTACCTGGAGGGAATATCAAAAATAAGCCATTGGGTTTGA | Cloning of <i>hp0579-580</i> in 26695                           |
| <b>CSO-SP078</b>  | TCCTAGTTAGTCACCCGGGTAGGAGTAGAAAAAACGATCACAG       | Cloning of <i>hp1206</i> in 26695                               |
| <b>CSO-SP079</b>  | ATTGTTTTAGTACCTGGAGGGAATAAGCGGATATTATTATGGGGCTTA  | Cloning of <i>hp1206</i> in 26695                               |
| <b>CSONI-0033</b> | TCAAAGCCACTAGTAAGTCTTACTT                         | Verification oligo for insertion of <i>rpsL-erm</i> cassette    |
| <b>JVO-0155</b>   | CCGTATGTAGCATCACCTTC                              | Cloning of GFP fusion <sup>1616</sup>                           |
| <b>JVO-0485</b>   | TCGGAATGGTAACTGGGTAGTTCTT                         | Northern blot probe for <i>Helicobacter pylori</i> 5S rRNA      |
| <b>JVO-2134</b>   | AAACCATAAGGAATGGTTGGAT                            | Northern blot probe for RepG                                    |
| <b>JVO-5069</b>   | CTTCACGCCCTTGTAATA                                | Verification of <i>repG</i> deletion mutant                     |
| <b>JVO-5070</b>   | GATAAGGTTTAGCGATGTAATCGT                          | RepG cloning                                                    |
| <b>JVO-5072</b>   | CGTTTCTTGACACGCTTAATT                             | RepG cloning                                                    |
| <b>JVO-5267</b>   | ACGGGGTGGTATTGTTTGAT                              | Quantitative RT-PCR ( <i>tlpB</i> )                             |
| <b>JVO-5268</b>   | AAGTGTAGCCTCCCCCTTTT                              | Quantitative RT-PCR ( <i>tlpB</i> )                             |
| <b>JVO-5257</b>   | TATAGGTTTTCATTTCTCCAC                             | Verification of <i>repG</i> deletion mutant                     |
| <b>pZE-A</b>      | GTGCCACCTGACGTCTAAGA                              | Colony PCR and sequencing of pZE12- <i>luc</i> derived plasmids |
| <b>pZE-XbaI</b>   | TCGTTTTATTGATGCCTCTAGA                            | Colony PCR and sequencing of pZE derived plasmids               |
| <b>HPK-1</b>      | GTACCCGGGTGACTAACTAGG                             | Amplification of <i>aphA-3</i> cassette                         |
| <b>HPK-2</b>      | TATCCCTCCAGGTAATAACA                              | Amplification of <i>aphA-3</i> cassette                         |



**Supplementary Table 6: Plasmids**

| <b>Name</b>             | <b>Description/Generation</b>                                                                                                                       | <b>Origin / marker</b>                  | <b>Reference</b>  |
|-------------------------|-----------------------------------------------------------------------------------------------------------------------------------------------------|-----------------------------------------|-------------------|
| pBA1-1                  | Intermediary plasmid for construction of pBA7-4                                                                                                     | p15A/ Amp <sup>R</sup> Erm <sup>R</sup> | This study        |
| pBA4-2                  | Intermediary plasmid for construction of pSP189-4 (pSP190-1)                                                                                        | p15A/ Amp <sup>R</sup> Gen <sup>R</sup> | This study        |
| pBA5-4                  | Intermediary plasmid for construction of pBA13-5                                                                                                    | p15A/ Amp <sup>R</sup>                  | This study        |
| pBA7-4                  | Plasmid for deletion of <i>hp0102</i> in diverse <i>H. pylori</i> strains                                                                           | p15A/ Amp <sup>R</sup> Erm <sup>R</sup> | This study        |
| pBA13-5                 | Plasmid for deletion of <i>tlpB</i> in <i>H. pylori</i> strain X47-2AL                                                                              | p15A/ Amp <sup>R</sup> Gen <sup>R</sup> | This study        |
| pJV752-1                | Cloning vector, pZE12- <i>luc</i> with modified p15A origin                                                                                         | p15A/ Amp <sup>R</sup>                  | Ref <sup>17</sup> |
| pMA5-2                  | Plasmid for translational fusion of the <i>cagA</i> -5' UTR including the 28 <sup>th</sup> amino acid to <i>gfpmut3</i>                             | p15A/ Amp <sup>R</sup> Cm <sup>R</sup>  | Ref <sup>2</sup>  |
| pSP39-3                 | Plasmid for complementation of <i>repG</i> deletion with RepG in <i>H. pylori</i> strain 26695                                                      | p15A/ Amp <sup>R</sup> Cm <sup>R</sup>  | Ref <sup>2</sup>  |
| pSP60-2                 | Backbone plasmid for deletion or nucleotide exchange in G-stretch in 5' UTR of <i>tlpB</i>                                                          | p15A/ Amp <sup>R</sup> Erm <sup>R</sup> | Ref <sup>2</sup>  |
| pSP127-3                | Plasmid for deletion of the <i>tlpB-hp0102</i> operon in <i>H. pylori</i> strain X47-2AL                                                            | p15A/ Amp <sup>R</sup> Gen <sup>R</sup> | This study        |
| pSP186-2                | Plasmid for deletion of <i>hp0102</i> in <i>H. pylori</i> strain X47-2AL                                                                            | p15A/ Amp <sup>R</sup> Gen <sup>R</sup> | This study        |
| pSP189-4                | Intermediary plasmid for construction of pSP190-1                                                                                                   | p15A/ Amp <sup>R</sup> Gen <sup>R</sup> | This study        |
| pSP190-1                | Plasmid for complementation of the <i>H. pylori</i> X47-2AL $\Delta$ <i>tlpB-hp0102</i> mutant with the <i>tlpB-hp0102</i> operon                   | p15A/ Amp <sup>R</sup> Kan <sup>R</sup> | This study        |
| pSP192-1                | Plasmid for complementation of the <i>H. pylori</i> X47-2AL $\Delta$ <i>tlpB-hp0102</i> and $\Delta$ <i>hp0102</i> mutants with <i>hp0102</i> alone | p15A/ Amp <sup>R</sup> Kan <sup>R</sup> | This study        |
| pSP195-6                | Plasmid for construction of <i>tlpB-hp0102</i> 10 <sup>th</sup> :: <i>gfpmut3</i> reporter fusion                                                   | p15A/ Amp <sup>R</sup> Cm <sup>R</sup>  | This study        |
| pSP197-3                | Plasmid for construction of <i>tlpB<sub>mini</sub>-hp0102</i> 10 <sup>th</sup> :: <i>gfpmut3</i> reporter fusion                                    | p15A/ Amp <sup>R</sup> Cm <sup>R</sup>  | This study        |
| pSP198-4                | Plasmid for construction of P <sub><i>tlpB</i></sub> <i>hp0102</i> 10 <sup>th</sup> :: <i>gfpmut3</i> reporter fusion                               | p15A/ Amp <sup>R</sup> Cm <sup>R</sup>  | This study        |
| pSP200-2                | Plasmid for construction of <i>tlpB-hp0102</i> 10 <sup>th</sup> :: <i>gfpmut3</i> $\Delta$ G <sup><i>hp0102</i></sup> reporter fusion               | p15A/ Amp <sup>R</sup> Cm <sup>R</sup>  | This study        |
| pSP201-1                | Plasmid for construction of <i>tlpB-hp0102</i> 10 <sup>th</sup> :: <i>gfpmut3</i> ATTTA <sup><i>hp0102</i></sup> reporter fusion                    | p15A/ Amp <sup>R</sup> Cm <sup>R</sup>  | This study        |
| pSP205-17               | Plasmid for construction of <i>tlpB<sub>stop</sub>-hp0102</i> 10 <sup>th</sup> :: <i>gfpmut3</i> reporter fusion                                    | p15A/ Amp <sup>R</sup> Cm <sup>R</sup>  | This study        |
| pUC1813 <sup>apra</sup> | Plasmid carrying apramycin/gentamicin resistance cassette <i>aac(3)-IV</i>                                                                          | pMB1/ Amp <sup>R</sup> Gen <sup>R</sup> | Ref <sup>18</sup> |

Kan<sup>R</sup>: kanamycin resistant; Cm<sup>R</sup>: chloramphenicol resistant; Erm<sup>R</sup>: erythromycin resistant;

Gen<sup>R</sup>: gentamicin resistant

**Supplementary Table 7: Sequences of *tlpB-hp0102::gfpmut3* reporter fusions used in this study.** The homopolymeric G-repeat in the 5' UTR of *tlpB* mRNA and the  $G^{hp0102}$ -repeat in the *tlpB-hp0102* IGR are underlined. The RBSs as well as start codons and ORFs are shown in light green and gray letters, respectively. Mutations within the  $G^{hp0102}$ -repeat are shown in red. Alteration of the *tlpB* start codon is shown in blue (two stop codons). The *NheI* restriction site is marked in yellow, the *gfpmut3* coding sequence is highlighted in green.

| Name                                                                     | Sequence 5' → 3'                                                                                                                                                                                                                                                                                                                                                                                                                                                                                                                                                                                                                                                                                                                                                                                                                                                                                                                                                                                                                                                                                                                                                                                                                                                                                                                                                                                                                                                                                                                                                                                                                                                                                                                                                                                                                                                                                                                                                                                                                                                                                                                                                                                                                                                                                                                                                                                                                                                                                                                                                                                                                                                                                                                                                                                                                                                                                                                                                                                                                                          |
|--------------------------------------------------------------------------|-----------------------------------------------------------------------------------------------------------------------------------------------------------------------------------------------------------------------------------------------------------------------------------------------------------------------------------------------------------------------------------------------------------------------------------------------------------------------------------------------------------------------------------------------------------------------------------------------------------------------------------------------------------------------------------------------------------------------------------------------------------------------------------------------------------------------------------------------------------------------------------------------------------------------------------------------------------------------------------------------------------------------------------------------------------------------------------------------------------------------------------------------------------------------------------------------------------------------------------------------------------------------------------------------------------------------------------------------------------------------------------------------------------------------------------------------------------------------------------------------------------------------------------------------------------------------------------------------------------------------------------------------------------------------------------------------------------------------------------------------------------------------------------------------------------------------------------------------------------------------------------------------------------------------------------------------------------------------------------------------------------------------------------------------------------------------------------------------------------------------------------------------------------------------------------------------------------------------------------------------------------------------------------------------------------------------------------------------------------------------------------------------------------------------------------------------------------------------------------------------------------------------------------------------------------------------------------------------------------------------------------------------------------------------------------------------------------------------------------------------------------------------------------------------------------------------------------------------------------------------------------------------------------------------------------------------------------------------------------------------------------------------------------------------------------|
| <i>tlpB-hp0102</i> 10 <sup>th</sup> - <i>gfpmut3</i>                     | <p><b>TGTTTGTTC</b><u>TTTTGTTTCGTTTTCAACAACCGGGTTTTAATTTGTTTTGTGCCACTCATTTTTCGGGGGGGGGGGTGCATTTAGAAGCTAAACTCTAAAATTAGGGTTTGA</u><br/> <b>CTTAAAAATGATTTAT</b><u>AGGAGATAAA</u><b>TGATGTTTTCTTCAATGTTTGCCTCGTTGGGGACTCGTATCATGCTGGTCGTGTAGCCGCTCTTTTAGGTTTAGGGGGGCTTTTAT</b><br/> <b>TGGTTTTGTA</b>AAAGGTTATGCAAAAAGATGTGTTAGCGCAACTCATGGAGCATTTAGAAACCGGGCAATACAAAAAGCGTGAAAAACGCTCGCTTACATGACAAAAATTATTGA<br/> ACAGGGCATT<b>CATGAGTATTACAAAAATTTGACAATGCTACTGCAAGAAAAATGGCGTTAGATATTTTCAAACGCATCAACGACGATAAGGGCATGATTTATATGTTGGTGGTGGT</b><br/> GGATAAAAACGGGGTGGTATTGTTTGATCCGGTCAATCC<b>TAAACCGTAGGCCAATCAGGGCTTGACGCTCAGACGCTTGTAGGGGTGATTATGTTAGGGGTATTTGGAGGC</b><br/> GGCCAAAAAGGGGGAGGGTACACTTATTATAAAATGCCTAAATACGATGGAGGCGTACCGGAGAAAAATTCGCCTACTCGCATTATGATGAAGTTTCTCAAATGGTGATCGC<br/> AACGACTTCC<b>TATTACACTGACATTAACACAGAAAA</b>TAAAGCGATCAAAGAAGGCGTGAATAAGGTTTTGATGAAAACACCACGAAATTA<b>TTCCTTTGGATACTGACAGCGAC</b><br/> GATAGCGCTAGTGGTTTTGACGCTCATATACGCTAAATTAAGGATCGTGAAACGCATTGATGA<b>ACTGGTCTTAAAAATCAACGCTTTTAGCCGTGGGGATAAAGGATTTGAGAGC</b><br/> CAAAATGATGTGGGTGATCGCAACGATGAAATC<b>TCGCAAGTGGGCCGTGGGATCAATTTGTTTTGTGAAAAACGCCGCTTGATTATGGAAGAGATTAAGGGATTTCCACCCT</b><br/> CAATAAA<b>ACTTCAATGGATAAA</b>TTAGTCCAAATCAGCAAGAAACCCAAAAGAGCATGAAAGATTCCTCAACCACCCTAAATTC<b>CGTGAAAAATAAAGCCACTGATATAGCGAG</b><br/> CATGATGAATGCTTCCATAGAGCAATCTCAAGGGTTAAGGAAGCGTTT<b>GATTGAAACGCAAGGGCTGGTCAAAGAGAGCAAGGATGCGATCGGGGATTTATTTCTCAAATCAC</b><br/> AGAGAGCGCCACACTGAAGAGAACTCTTAGCAAAAGTGAGCAGCTAAGCCGTAAACGCTGATGATGTCAAATCCATTCTGGATATTCAATGATATTGCCGATCAAACGAA<br/> TTTATTAGCCCTAAACGCTGCTATTGAAGCCGCAAGGGCTGGCGAGCATGGCAGAGGCTTTGCGGTGGTGGCTGATGAAGTTAGGAATTTAGCCGGGCGCACTCAAAGTCTTT<br/> AGCCGAAATCAATTC<b>CACTATCATGGT</b>GATGTG<b>TCCAAGAAATCAATGCCGTGAGTTCGCAAAATGAATCTCAATTCGCAAAAAATGGAGCGTTT</b>GAGCGATATGAGTAAAGCGT<br/> GCAAGAACTTACGAAAAAATGAGTTCTAATTTAAGCTCAGT<b>CGTGTGACAGCAATCAAAGCATGGACGATTACGCCAAATCCGGACACCAAAATGAAGTTATGGTAAAGCGA</b><br/> TTTTGCAGAGTGGAAAAAGTGGCTTCTAAGACTTTAGCGGATTCTT<b>CAGATATTTTAAACATCGCTACGCATGTGAGTGGAAACGACCATGAATTTAGACAAACAAGTGAATTT</b><br/> GTTTTAA<b>ACTTAATCAGGGGGAGTTTATTA</b>AAAAAGGGTTGGA<b>TTGTT</b>AAAAAGTTTCTGTGATCACGGCGTGT<b>GCTAGCAGTAAAGGAGAAGA</b>ACTTTTCACTGGAGTTGTCC<b>CC</b><br/> <b>AAATCTTGTGAATTAGATGGT</b>GATGTTAATGGGCACAAATTTTCTGT<b>CAGTGGAGAGGGTGAAGGTGATGCAACATACGGA</b>AACTTACCCTTAAATTTATTTGCACTACTGG<br/> AAA<b>ACTACCTGTTCCATGGCCAACACTTGTCACTACTTT</b>CGGTTATGGTGTCAATGCTTTGCGAGATACCCAGATCATATGAACAGCATGACTTTTCAAGAGTGCATGCC<br/> CGAAGGTTATGTACAGGAAGA<b>ACTATATTTTCAAAGATGACGGGA</b>ACTACAAGACACGTGCTGAAGTCAAGTTGAAGGTGATACCCTTGTTAATAGAATCGAGTTAAAGG<br/> TATTGATTTTAAAGAAAGATGGAAACAT<b>TCTTGGACACAAATGGAATACA</b>ACTATAACTCACACAATGATATACATCATGGCAGACAAACAAAAGAAATGGAATCAAAGTTAACTT<br/> CAAAATTAGACACAACATGAAGATGGAAGCGTCAACTAGCAGACCATATCAACAAAATACTCCAATGGCGATGGCCCTGTCTTTTACCAGACAACCATTACCTGTCCAC<br/> ACAA<b>TCTGCCCTTT</b>CGAAAGATCCCAACGAAAAGAGAGACCACATGGTCTTCTTGAGTTTGTAAACAGCTGCTGGGATTACACATGGCATGGATGAAC<b>TATACAAATAA</b></p> |
| <i>tlpB<sub>mini</sub>-hp0102</i> 10 <sup>th</sup> - <i>gfpmut3</i>      | <p><b>TGTTTGTTC</b><u>TTTTGTTTCGTTTTCAACAACCGGGTTTTAATTTGTTTTGTGCCACTCATTTTTCGGGGGGGGGGGTGCATTTAGAAGCTAAACTCTAAAATTAGGGTTTGA</u><br/> <b>CTTAAAAATGATTTAT</b><u>AGGAGATAAA</u><b>TGATGTTTTCTTCAATGTTTGCCTCGTTGGGGACTCGTATCATGCTGGTCGTGTAGCCCTAATCAGGGGGAGTTTATTA</b>AAAAAGGGT<br/> TGGAT<b>TGTT</b>AAAAAGTTTCTGTGATCACGGCGTGT<b>GCTAGCAGT-GFP</b>MUT3-TAA</p>                                                                                                                                                                                                                                                                                                                                                                                                                                                                                                                                                                                                                                                                                                                                                                                                                                                                                                                                                                                                                                                                                                                                                                                                                                                                                                                                                                                                                                                                                                                                                                                                                                                                                                                                                                                                                                                                                                                                                                                                                                                                                                                                                                                                                                                                                                                                                                                                                                                                                                                                                                                                                                                                                             |
| <i>P<sub>tlpB</sub>hp0102</i> 10 <sup>th</sup> - <i>gfpmut3</i>          | <p><b>TCAGGGGGAGTTTATTA</b>AAAAAGGGTTGGA<b>TGTT</b>AAAAAGTTTCTGTGATCACGGCGTGT<b>GCTAGCAGT-GFP</b>MUT3-TAA</p>                                                                                                                                                                                                                                                                                                                                                                                                                                                                                                                                                                                                                                                                                                                                                                                                                                                                                                                                                                                                                                                                                                                                                                                                                                                                                                                                                                                                                                                                                                                                                                                                                                                                                                                                                                                                                                                                                                                                                                                                                                                                                                                                                                                                                                                                                                                                                                                                                                                                                                                                                                                                                                                                                                                                                                                                                                                                                                                                             |
| <i>tlpB-hp0102</i> 10 <sup>th</sup> - <i>gfpmut3</i> $\Delta G^{hp0102}$ | <p><b>TGTTTGTTC</b><u>TTTTGTTTCGTTTTCAACAACCGGGTTTTAATTTGTTTTGTGCCACTCATTTTTCGGGGGGGGGGGTGCATTTAGAAGCTAAACTCTAAAATTAGGGTTTGA</u><br/> <b>CTTAAAAATGATTTAT</b><u>AGGAGATAAA</u><b>TGATG</b>-TLPB CODING REGION-<b>TAATCAAGTTTATTA</b>AAAAAGGGTTGGA<b>TGTT</b>TAA<br/> AGTTTCTGTGATCACGGCGTGT<b>GCTAGCAGT-GFP</b>MUT3-TAA</p>                                                                                                                                                                                                                                                                                                                                                                                                                                                                                                                                                                                                                                                                                                                                                                                                                                                                                                                                                                                                                                                                                                                                                                                                                                                                                                                                                                                                                                                                                                                                                                                                                                                                                                                                                                                                                                                                                                                                                                                                                                                                                                                                                                                                                                                                                                                                                                                                                                                                                                                                                                                                                                                                                                                               |

|                                                                         |                                                                                                                                                                                                                                                                                                           |
|-------------------------------------------------------------------------|-----------------------------------------------------------------------------------------------------------------------------------------------------------------------------------------------------------------------------------------------------------------------------------------------------------|
| <p><i>tlpB</i>-hp0102 10<sup>th</sup>-gfpmut3 ATTA<sup>hp0102</sup></p> | <p>TGTTTGTTCCTTTGTTTCGTTTTCAACAACCGGGTTTTAATTTGTTTTGTGCCACTCATTTTCGGGGGGGGGGTGCATTTAGAAGCTAAACTCTAAAATTAGGGTTGA<br/> CTTAAAAATGATTTATAGGAGATAAATGATG-TLPB CODING REGION-TAATCAATTAAGTTTATTA AAAAAGGGTTGGATTG<br/> TTAAAAGTTTCTGTGATCACGGCGTGTGCTAGCAGT-GFPMUT3-TAA</p>                                    |
| <p><i>tlpB</i><sub>stop</sub>-hp0102 10<sup>th</sup>-gfpmut3</p>        | <p>TGTTTGTTCCTTTGTTTCGTTTTCAACAACCGGGTTTTAATTTGTTTTGTGCCACTCATTTTCGGGGGGGGGGTGCATTTAGAAGCTAAACTCTAAAATTAGGGTTGA<br/> CTTAAAAATGATTTATAGGAGATAAATAGTAAATTTCTTCAATGTTGCTTCGTTGGGGACTCGTATCATGCTGGTGGTGTAGCCTAATCAGGGGGAGTTTATTA AAAAAGGGT<br/> TGGAATTGTTAAAAGTTTCTGTGATCACGGCGTGTGCTAGCAGT-GFPMUT3-TAA</p> |

**Supplementary Table 8: Sequences of *tlpB* leader mutants of *H. pylori* strain 26695.** The length-variable homopolymeric G-repeat in the 5' UTR of the *tlpB* mRNA is shown in red, and the RBS as well as start codon are marked in light green.

| Name            | Sequence 5' → 3'                                                                                                                             |
|-----------------|----------------------------------------------------------------------------------------------------------------------------------------------|
| <i>tlpB</i> WT  | TGTTTGGTCTTTTGTTCGTTTTCAAACAACCGGGTTTTAATTTGTTTTGTGCCACTCATTTCGGGGGGGGGGTGCATTTAGAAGCTAAACTCTAAAATTAGGGTTTGACTTAAAAATGATTTATAGGAGATAAATG     |
| <i>tlpB</i> ΔG  | TGTTTGGTCTTTTGTTCGTTTTCAAACAACCGGGTTTTAATTTGTTTTGTGCCACTCATTTCCTGCATTTAGAAGCTAAACTCTAAAATTAGGGTTTGACTTAAAAATGATTTATAGGAGATAAATG              |
| <i>tlpB</i> 6G  | TGTTTGGTCTTTTGTTCGTTTTCAAACAACCGGGTTTTAATTTGTTTTGTGCCACTCATTTCGGGGGGTGCATTTAGAAGCTAAACTCTAAAATTAGGGTTTGACTTAAAAATGATTTATAGGAGATAAATG         |
| <i>tlpB</i> 7G  | TGTTTGGTCTTTTGTTCGTTTTCAAACAACCGGGTTTTAATTTGTTTTGTGCCACTCATTTCGGGGGGTGCATTTAGAAGCTAAACTCTAAAATTAGGGTTTGACTTAAAAATGATTTATAGGAGATAAATG         |
| <i>tlpB</i> 8G  | TGTTTGGTCTTTTGTTCGTTTTCAAACAACCGGGTTTTAATTTGTTTTGTGCCACTCATTTCGGGGGGGTGCATTTAGAAGCTAAACTCTAAAATTAGGGTTTGACTTAAAAATGATTTATAGGAGATAAATG        |
| <i>tlpB</i> 9G  | TGTTTGGTCTTTTGTTCGTTTTCAAACAACCGGGTTTTAATTTGTTTTGTGCCACTCATTTCGGGGGGGGTGCATTTAGAAGCTAAACTCTAAAATTAGGGTTTGACTTAAAAATGATTTATAGGAGATAAATG       |
| <i>tlpB</i> 10G | TGTTTGGTCTTTTGTTCGTTTTCAAACAACCGGGTTTTAATTTGTTTTGTGCCACTCATTTCGGGGGGGGGTGCATTTAGAAGCTAAACTCTAAAATTAGGGTTTGACTTAAAAATGATTTATAGGAGATAAATG      |
| <i>tlpB</i> 11G | TGTTTGGTCTTTTGTTCGTTTTCAAACAACCGGGTTTTAATTTGTTTTGTGCCACTCATTTCGGGGGGGGGGTGCATTTAGAAGCTAAACTCTAAAATTAGGGTTTGACTTAAAAATGATTTATAGGAGATAAATG     |
| <i>tlpB</i> 13G | TGTTTGGTCTTTTGTTCGTTTTCAAACAACCGGGTTTTAATTTGTTTTGTGCCACTCATTTCGGGGGGGGGGGGTGCATTTAGAAGCTAAACTCTAAAATTAGGGTTTGACTTAAAAATGATTTATAGGAGATAAATG   |
| <i>tlpB</i> 14G | TGTTTGGTCTTTTGTTCGTTTTCAAACAACCGGGTTTTAATTTGTTTTGTGCCACTCATTTCGGGGGGGGGGGGGTGCATTTAGAAGCTAAACTCTAAAATTAGGGTTTGACTTAAAAATGATTTATAGGAGATAAATG  |
| <i>tlpB</i> 15G | TGTTTGGTCTTTTGTTCGTTTTCAAACAACCGGGTTTTAATTTGTTTTGTGCCACTCATTTCGGGGGGGGGGGGGGTGCATTTAGAAGCTAAACTCTAAAATTAGGGTTTGACTTAAAAATGATTTATAGGAGATAAATG |
| <i>tlpB</i> 16G | TGTTTGGTCTTTTGTTCGTTTTCAAACAACCGGGTTTTAATTTGTTTTGTGCCACTCATTTCGGGGGGGGGGGGGGTGCATTTAGAAGCTAAACTCTAAAATTAGGGTTTGACTTAAAAATGATTTATAGGAGATAAATG |

## Supplementary References

1. Sharma, C. M. *et al.* The primary transcriptome of the major human pathogen *Helicobacter pylori*. *Nature* **464**, 250–255 (2010).
2. Pernitzsch, S. R., Tirier, S. M., Beier, D. & Sharma, C. M. A variable homopolymeric G-repeat defines small RNA-mediated posttranscriptional regulation of a chemotaxis receptor in *Helicobacter pylori*. *Proc. Natl. Acad. Sci. USA* **111**, E501-10 (2014).
3. Li, H. *et al.* Lipopolysaccharide Structure and Biosynthesis in *Helicobacter pylori*. *Helicobacter* **21**, 445–461 (2016).
4. Li, H. *et al.* East-Asian *Helicobacter pylori* strains synthesize heptan-deficient lipopolysaccharide. *PLoS Genet.* **15**, e1008497 (2019).
5. Kennemann, L. *et al.* *Helicobacter pylori* genome evolution during human infection. *Proc. Natl. Acad. Sci. USA* **108**, 5033–5038 (2011).
6. Devi, S. H. *et al.* Genome of *Helicobacter pylori* strain 908. *J. Bacteriol.* **192**, 6488–6489 (2010).
7. Avasthi, T. S. *et al.* Genomes of two chronological isolates (*Helicobacter pylori* 2017 and 2018) of the West African *Helicobacter pylori* strain 908 obtained from a single patient. *J. Bacteriol.* **193**, 3385–3386 (2011).
8. Linz, B. *et al.* A mutation burst during the acute phase of *Helicobacter pylori* infection in humans and rhesus macaques. *Nat. Commun.* **5**, 4165 (2014).
9. Nell, S. *et al.* Genome and Methylome Variation in *Helicobacter pylori* With a *cag* Pathogenicity Island During Early Stages of Human Infection. *Gastroenterology* **154**, 612–623.e7 (2018).
10. Salaün, L., Ayraud, S. & Saunders, N. J. Phase variation mediated niche adaptation during prolonged experimental murine infection with *Helicobacter pylori*. *Microbiology (Reading, Engl.)* **151**, 917–923 (2005).
11. Behrens, W. *et al.* Role of energy sensor TlpD of *Helicobacter pylori* in gerbil colonization and genome analyses after adaptation in the gerbil. *Infect. Immun.* **81**, 3534–3551 (2013).
12. Tomb, J. F. *et al.* The complete genome sequence of the gastric pathogen *Helicobacter pylori*. *Nature* **388**, 539–547 (1997).
13. Veyrier, F. J., Ecobichon, C. & Boneca, I. G. Draft Genome Sequence of Strain X47-2AL, a Feline *Helicobacter pylori* Isolate. *Genome Announc.* **1**, (2013).
14. Baltrus, D. A. *et al.* The complete genome sequence of *Helicobacter pylori* strain G27. *J. Bacteriol.* **191**, 447–448 (2009).
15. Alm, R. A. & Trust, T. J. Analysis of the genetic diversity of *Helicobacter pylori*: the tale of two genomes. *J. Mol. Med.* **77**, 834–846 (1999).
16. Urban, J. H. & Vogel, J. Translational control and target recognition by *Escherichia coli* small RNAs *in vivo*. *Nucleic Acids Res.* **35**, 1018–1037 (2007).
17. Sharma, C. M., Darfeuille, F., Plantinga, T. H. & Vogel, J. A small RNA regulates multiple ABC transporter mRNAs by targeting C/A-rich elements inside and upstream of ribosome-binding sites. *Genes Dev.* **21**, 2804–2817 (2007).
18. Bury-Moné, S. *et al.* Presence of active aliphatic amidases in *Helicobacter* species able to colonize the stomach. *Infect. Immun.* **71**, 5613–5622 (2003).
